# Supplementary material for: Super-resolution Raman imaging towards visualisation of nanoplastics
Source: Royal Society of Chemistry journal article supplement (doi:10.1039/d3ay01176c), 2023-01-01
Supplement: d3ay01176c1.pdf [file d3ay01176c1.pdf]

# Super-resolution Raman imaging towards improved visualisation of nanoplastics

Cheng Fang<sup>a, b\*</sup>, Yunlong Luo<sup>a</sup>, Ravi Naidu<sup>a, b</sup>

<sup>a</sup> Global Centre for Environmental Remediation (GCER), University of Newcastle, Callaghan NSW 2308, Australia.

<sup>b</sup> Cooperative Research Centre for Contamination Assessment and Remediation of the Environment (CRC CARE), University of Newcastle, Callaghan NSW 2308, Australia.

\*Corresponding author: Cheng Fang, E-mail: [cheng.fang@newcastle.edu.au](mailto:cheng.fang@newcastle.edu.au)

## ***Supporting Information***

## Contents

|                                                                 |    |
|-----------------------------------------------------------------|----|
| 1. Figure S1 / Table S1: More information for Figures 2-3 ..... | 3  |
| 2. Figure S2 / Table S2: More information for Figure 3 .....    | 5  |
| 2.1. <i>PCA analysis parameters for Figure 3</i> .....          | 5  |
| 2.2. <i>Fitting parameters for Figure 3</i> .....               | 6  |
| 3. Figure S3 / Table S3: More information for Figures 4-5 ..... | 7  |
| 4. Table S4: More information for Figure 5 .....                | 9  |
| 5. Gaussian surface fitting code (Generated by ChatGPT).....    | 13 |
| 6. Real sample #3: mixture .....                                | 14 |

# 1. Figure S1 / Table S1: More information for Figures 2-3

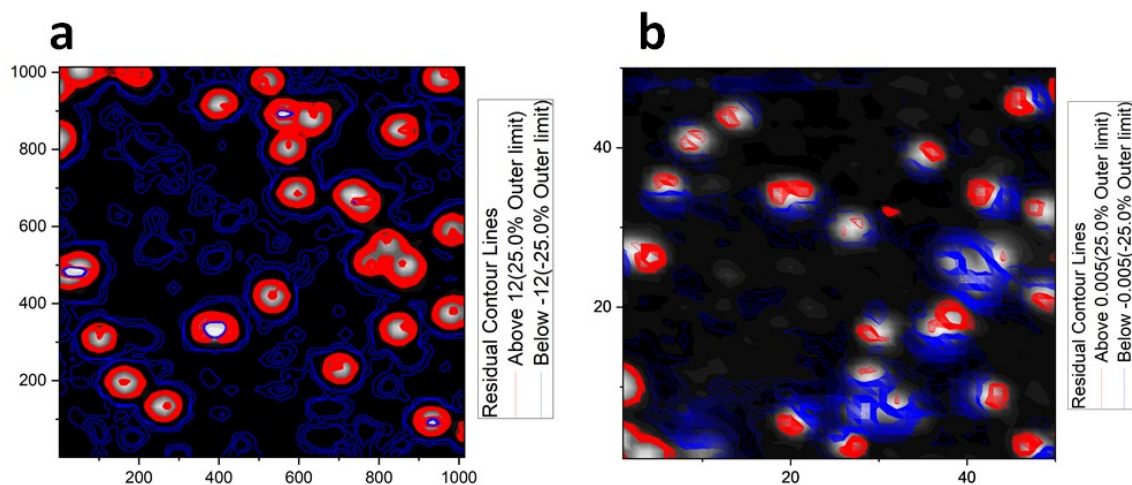

Figure S1. Fitting residues for Figures 2-3. (a) is for Figure 2 (without PCA) while (b) is for Figure 3 (with PCA).

Figure S1 shows the fitting residues. In (a), while the strong signals are paid more attention, the weak signal has a very limited contribution, which needs more research. Particularly, once these weak signal can be confirmed as the nanoplastics, the fitting should covered them as well to re-construct the image, as shown in Figure 3 and in (b). Note the fitting in (a) starts up from the Raman intensity image with a pixel of  $1024 \times 1024$ , while (b) starts up from the loading coefficient of an array of  $50 \times 50$ .

Table S1. Parameters Summary for the fitting peaks (all data for the  $x \times y$  axis of  $1014 \times 1014$ , after removing boundary from  $1024 \times 1024$  of the image with size of  $10 \mu\text{m} \times 10 \mu\text{m}$ ). The highlight (in yellow) marks the peaks for Figures 2(i, j).

|               | z0       |                | A     |                | xc    |                | w1        |                | yc    |                | w2      |                | FWHMx     |                | FWHMy    |                |
|---------------|----------|----------------|-------|----------------|-------|----------------|-----------|----------------|-------|----------------|---------|----------------|-----------|----------------|----------|----------------|
|               | Value    | Standard Error | Value | Standard Error | Value | Standard Error | Value     | Standard Error | Value | Standard Error | Value   | Standard Error | Value     | Standard Error | Value    | Standard Error |
| Peak1(Sheet1) | 18.38568 | --235.61432    | --    | --             | 50    | --             | 11        | --             | 482   | --             | 7.68987 | --             | -25.90302 | 0              | 18.10825 | 0              |
| Peak2(Sheet1) | 18.38568 | --235.61432    | --    | --             | 61    | --             | -10.09146 | --             | 482   | --             | 7.10049 | --             | -23.76356 | 0              | 16.72038 | 0              |
| Peak3(Sheet1) | 18.38568 | --235.61432    | --    | --             | 39    | --             | 11        | --             | 482   | --             | 7.35467 | --             | -25.90302 | 0              | 17.31892 | 0              |
| Peak4(Sheet1) | 18.38568 | --235.61432    | --    | --             | 28    | --             | -12.76591 | --             | 482   | --             | 7.35095 | --             | -30.06143 | 0              | 17.31016 | 0              |
| Peak5(Sheet1) | 18.38568 | --235.61432    | --    | --             | 738   | --             | -5.68465  | --             | 666   | --             | 4.794   | --             | -13.38633 | 0              | 11.28901 | 0              |

|                       |                 |                    |               |                   |               |                   |                   |                  |          |
|-----------------------|-----------------|--------------------|---------------|-------------------|---------------|-------------------|-------------------|------------------|----------|
| Peak6(Sheet1)         | 18.38568        | --235.61432        | -- 410        | -- 5.68465        | -- 338        | -- 7.68987        | --13.38633        | 018.10825        | 0        |
| Peak7(Sheet1)         | 18.38568        | --235.61432        | -- 403        | -- 9              | -- 338        | -- 9.5642         | --21.19338        | 022.52198        | 0        |
| Peak8(Sheet1)         | 18.38568        | --235.61432        | -- 392        | -- 11             | -- 338        | -- 7.35467        | --25.90302        | 017.31892        | 0        |
| Peak9(Sheet1)         | 18.38568        | --235.61432        | -- 756        | --17.47346        | -- 666        | -- 7.35095        | --41.14685        | 017.31016        | 0        |
| <b>Peak10(Sheet1)</b> | <b>18.38568</b> | <b>--235.61432</b> | <b>-- 390</b> | <b>--12.76591</b> | <b>-- 318</b> | <b>-- 4.21869</b> | <b>--30.06143</b> | <b>0 9.93425</b> | <b>0</b> |
| <b>Peak11(Sheet1)</b> | <b>18.38568</b> | <b>--235.61432</b> | <b>-- 389</b> | <b>--17.27454</b> | <b>-- 325</b> | <b>--12.76591</b> | <b>--40.67842</b> | <b>030.06143</b> | <b>0</b> |
| <b>Peak12(Sheet1)</b> | <b>18.38568</b> | <b>--235.61432</b> | <b>-- 370</b> | <b>-- 7.35467</b> | <b>-- 338</b> | <b>-- 8.18595</b> | <b>--17.31892</b> | <b>019.27645</b> | <b>0</b> |
| <b>Peak13(Sheet1)</b> | <b>18.38568</b> | <b>--235.61432</b> | <b>-- 381</b> | <b>-- 11</b>      | <b>-- 338</b> | <b>--10.06029</b> | <b>--25.90302</b> | <b>023.69018</b> | <b>0</b> |
| <b>Peak14(Sheet1)</b> | <b>18.38568</b> | <b>--235.61432</b> | <b>-- 861</b> | <b>-- 8.97483</b> | <b>-- 502</b> | <b>-- 6.36249</b> | <b>-- 21.1341</b> | <b>014.98252</b> | <b>0</b> |
| Peak15(Sheet1)        | 18.38568        | --234.61432        | -- 164        | --12.66748        | -- 195        | -- 6.8439         | --29.82962        | 016.11616        | 0        |
| Peak16(Sheet1)        | 18.38568        | --234.61432        | -- 267        | -- 9.20559        | -- 134        | -- 8.00881        | --21.67751        | 0 18.8593        | 0        |
| Peak17(Sheet1)        | 18.38568        | --234.61432        | -- 860        | --10.57892        | -- 338        | -- 6.8439         | --24.91145        | 016.11616        | 0        |
| Peak18(Sheet1)        | 18.38568        | --234.61432        | -- 942        | -- 8.4191         | -- 93         | -- 6.50569        | --19.82546        | 015.31974        | 0        |
| Peak19(Sheet1)        | 18.38568        | --234.61432        | -- 554        | -- 6.34886        | -- 891        | -- 7.04577        | --14.95042        | 016.59152        | 0        |
| Peak20(Sheet1)        | 18.38568        | --234.61432        | -- 22         | --10.34517        | -- 482        | -- 9.20559        | --24.36102        | 021.67751        | 0        |
| Peak21(Sheet1)        | 18.38568        | --234.61432        | -- 934        | -- 9.5            | -- 93         | -- 6.50569        | --22.37079        | 015.31974        | 0        |
| Peak22(Sheet1)        | 18.38568        | --234.61432        | -- 923        | -- 7.97825        | -- 93         | -- 6.50569        | --18.78735        | 015.31974        | 0        |
| Peak23(Sheet1)        | 18.38568        | --234.61432        | -- 561        | --12.73874        | -- 891        | -- 6.25576        | --29.99743        | 0 14.7312        | 0        |
| Peak24(Sheet1)        | 18.38568        | --233.61432        | -- 574        | -- 6.3352         | -- 809        | -- 7.32319        | --14.91825        | 017.24478        | 0        |
| Peak25(Sheet1)        | 18.38568        | --233.61432        | -- 572        | --14.50212        | -- 891        | -- 7.29021        | --34.14989        | 017.16714        | 0        |
| Peak26(Sheet1)        | 18.38568        | --233.61432        | -- 594        | -- 9.26266        | -- 687        | -- 6.4917         | -- 21.8119        | 015.28678        | 0        |
| Peak27(Sheet1)        | 18.38568        | --233.61432        | -- 635        | -- 7.9409         | -- 890        | --11.37935        | --18.69939        | 026.79631        | 0        |
| Peak28(Sheet1)        | 18.38568        | --233.61432        | -- 983        | -- 9.3218         | -- 379        | -- 6.82919        | --21.95117        | 016.08152        | 0        |
| Peak29(Sheet1)        | 18.38568        | --233.61432        | -- 533        | -- 9.99679        | -- 420        | -- 8.823          | --23.54064        | 020.77657        | 0        |
| Peak30(Sheet1)        | 18.38568        | --231.61432        | -- 859        | --12.76346        | -- 850        | -- 7.70846        | --30.05565        | 018.15204        | 0        |
| Peak31(Sheet1)        | 18.38568        | --228.61432        | -- 410        | -- 9.08654        | -- 912        | -- 5.49379        | --21.39717        | 0 12.9369        | 0        |
| Peak32(Sheet1)        | 18.38568        | --224.61432        | -- 103        | -- 6.21088        | -- 317        | --10.60366        | --14.62551        | 024.96971        | 0        |
| Peak33(Sheet1)        | 18.38568        | --210.61432        | -- 697        | --14.51675        | -- 236        | -- 5.92406        | --34.18433        | 013.95009        | 0        |
| Peak34(Sheet1)        | 18.38568        | --204.61432        | -- 963        | -- 8.59387        | -- 993        | -- 8.36909        | --20.23702        | 019.70769        | 0        |
| Peak35(Sheet1)        | 18.38568        | --193.61432        | -- 820        | -- 6.21228        | -- 563        | -- 9.83776        | -- 14.6288        | 023.16616        | 0        |
| Peak36(Sheet1)        | 18.38568        | --173.61432        | -- 984        | -- 6.59385        | -- 584        | -- 9.95422        | --15.52733        | 023.44039        | 0        |
| Peak37(Sheet1)        | 18.38568        | --164.61432        | -- 513        | -- 7.98692        | -- 973        | -- 9.69053        | --18.80777        | 022.81944        | 0        |
| Peak38(Sheet1)        | 18.38568        | --151.61432        | -- 779        | -- 6.15823        | -- 502        | -- 9.29644        | --14.50152        | 021.89144        | 0        |
| Peak39(Sheet1)        | 18.38568        | -- 84.61432        | -- 185        | --11.45345        | -- 994        | -- 5.38304        | --26.97082        | 012.67609        | 0        |
| Peak40(Sheet1)        | 18.38568        | -- 54.61432        | --1004        | -- 3.50268        | -- 72         | -- 5.21737        | -- 8.24818        | 012.28597        | 0        |
| Peak41(Sheet1)        | 18.38568        | -- 12.61432        | -- 686        | -- 2.89694        | -- 912        | -- 2.89694        | -- 6.82176        | 0 6.82176        | 0        |
| Peak42(Sheet1)        | 18.38568        | -- 6.61432         | -- 901        | -- 3.08455        | -- 563        | -- 3.08455        | -- 7.26357        | 0 7.26357        | 0        |
| Peak43(Sheet1)        | 18.38568        | -- 4.61432         | -- 226        | -- 1.68456        | -- 543        | -- 2.46706        | -- 3.96683        | 0 5.80949        | 0        |
| Peak44(Sheet1)        | 18.38568        | -- 4.61432         | -- 243        | -- 1.68456        | -- 543        | -- 1.68456        | -- 3.96683        | 0 3.96683        | 0        |
| Peak45(Sheet1)        | 18.38568        | -- 4.61432         | -- 233        | -- 1.68456        | -- 544        | -- 2.49907        | -- 3.96683        | 0 5.88486        | 0        |
| Peak46(Sheet1)        | 18.38568        | -- 3.61432         | -- 185        | -- 1.46287        | -- 51         | -- 1.98225        | -- 3.44481        | 0 4.66784        | 0        |

## 2. Figure S2 / Table S2: More information for Figure 3

### 2.1. PCA analysis parameters for Figure 3

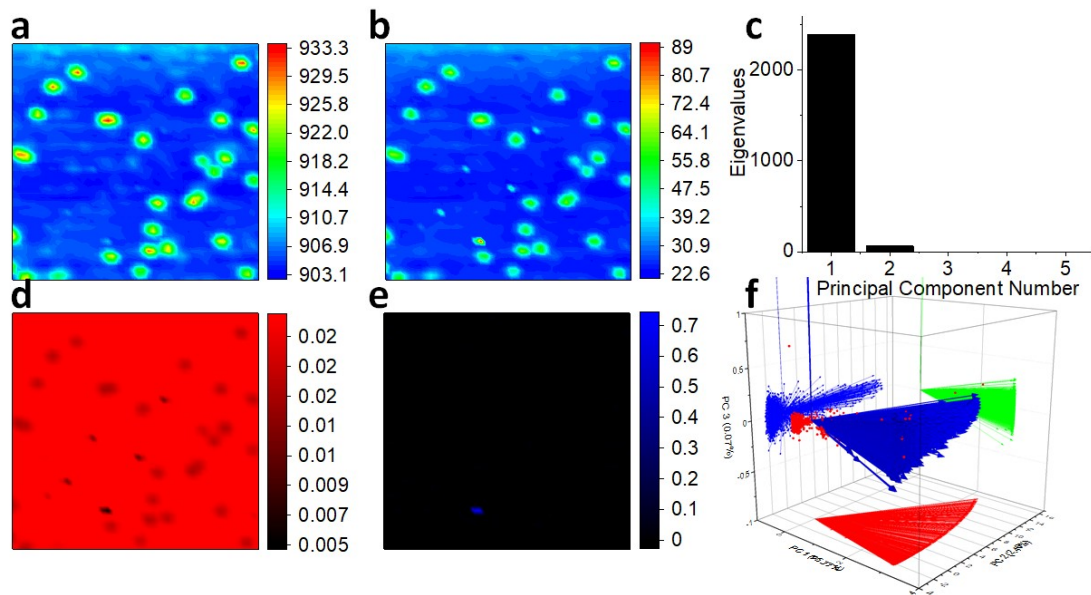

Figure S2. PCA analysis on the raw data in Figure 2, including the mapped mean (a), standard variation (b), scree plot (c), mapped coefficients of PC1 (d) and PC3 (e), loading plot (f).

Figure S2 shows the PCA analysis parameters for Figure 3. The mapped mean can tell us where the main signal (or main variance) are collected. The mapped variation reminds us where the PCA calculation is not so confident and we should be cautious to draw the conclusion. Scree plot indicates the main variance of PCA analysis is taken in PC1 and PC2.

The mapped coefficients of PC1 and PC3 can support the assignment of PC1 to background, and PC3 to noise, such as cosmic ray from the detector. The loading plot implied that most of the PCs are independent from each other.

## 2.2. Fitting parameters for Figure 3

Table S2. Parameters Summary for the fitting peaks (all data for the  $x \times y$  axis of  $50 \times 50$ , for the image with size of  $10 \mu\text{m} \times 10 \mu\text{m}$ ).

|             | z0      |                | A         |                | xc    |                | w1       |                | yc    |                | w2       |                | FWHMx     |                | FWHMy    |                | Volume  |
|-------------|---------|----------------|-----------|----------------|-------|----------------|----------|----------------|-------|----------------|----------|----------------|-----------|----------------|----------|----------------|---------|
|             | Value   | Standard Error | Value     | Standard Error | Value | Standard Error | Value    | Standard Error | Value | Standard Error | Value    | Standard Error | Value     | Standard Error | Value    | Standard Error | Value   |
| Peak1(PC2)  | 0.00483 | -              | --0.08847 | --             | 20    | --             | -1.72769 | --             | 34    | --             | -1.34432 | --             | 4.06839   | 0              | 3.16564  | 0              | 1.29111 |
| Peak2(PC2)  | 0.00483 | -              | --0.08837 | --             | 37    | --             | 1.5442   | --             | 17    | --             | -1.58568 | --             | 3.63632   | 0              | 3.73399  | 0              | 1.35954 |
| Peak3(PC2)  | 0.00483 | -              | --0.08789 | --             | 2     | --             | -1.93986 | --             | 27    | --             | -1.33572 | --             | 4.56801   | 0              | 3.14537  | 0              | 1.43083 |
| Peak4(PC2)  | 0.00483 | -              | --0.08757 | --             | 43    | --             | -1.58337 | --             | 26    | --             | -1.64652 | --             | 3.72855   | 0              | 3.87726  | 0              | 1.43444 |
| Peak5(PC2)  | 0.00483 | -              | --0.08631 | --             | 28    | --             | -1.82243 | --             | 7     | --             | -1.29551 | --             | 4.2915    | 0              | 3.0507   | 0              | 1.28036 |
| Peak6(PC2)  | 0.00483 | -              | --0.08527 | --             | 49    | --             | -1.25536 | --             | 32    | --             | -1.30274 | --             | 2.95614   | 0              | 3.06773  | 0              | 0.87621 |
| Peak7(PC2)  | 0.00483 | -              | --0.08468 | --             | 9     | --             | -1.37387 | --             | 41    | --             | -1.22444 | --             | 3.23522   | 0              | 2.88334  | 0              | 0.89502 |
| Peak8(PC2)  | 0.00483 | -              | --0.08412 | --             | 30    | --             | -1.16125 | --             | 17    | --             | -1.29341 | --             | 2.73454   | 0              | 3.04576  | 0              | 0.79387 |
| Peak9(PC2)  | 0.00483 | -              | --0.08381 | --             | 27    | --             | -1.36013 | --             | 30    | --             | -1.31291 | --             | 3.20285   | 0              | 3.09166  | 0              | 0.94036 |
| Peak10(PC2) | 0.00483 | -              | --0.08265 | --             | 43    | --             | -1.33339 | --             | 34    | --             | -1.30912 | --             | 3.1399    | 0              | 3.08275  | 0              | 0.9065  |
| Peak11(PC2) | 0.00483 | -              | --0.08225 | --             | 29    | --             | 1.4725   | --             | 11    | --             | -1.24779 | --             | 3.46746   | 0              | 2.93831  | 0              | 0.94955 |
| Peak12(PC2) | 0.00483 | -              | --0.08204 | --             | 41    | --             | -1.42554 | --             | 23    | --             | -1.63661 | --             | 3.35688   | 0              | 3.85392  | 0              | 1.20258 |
| Peak13(PC2) | 0.00483 | -              | --0.08167 | --             | 47    | --             | -1.31558 | --             | 46    | --             | -0.97728 | --             | 3.09795   | 0              | 2.30132  | 0              | 0.65973 |
| Peak14(PC2) | 0.00483 | -              | --0.0809  | --             | 6     | --             | -1.30259 | --             | 35    | --             | -1.26196 | --             | 3.06737   | 0              | 2.97169  | 0              | 0.83561 |
| Peak15(PC2) | 0.00483 | -              | --0.08072 | --             | 32    | --             | -1.78627 | --             | 7     | --             | -1.35577 | --             | 4.20634   | 0              | 3.1926   | 0              | 1.2282  |
| Peak16(PC2) | 0.00483 | -              | --0.08046 | --             | 14    | --             | -1.30012 | --             | 44    | --             | -1.16984 | --             | 3.06155   | 0              | 2.75477  | 0              | 0.76886 |
| Peak17(PC2) | 0.00483 | -              | --0.08017 | --             | 42    | --             | 1.4463   | --             | 9     | --             | -1.22376 | --             | 3.40579   | 0              | 2.88174  | 0              | 0.8916  |
| Peak18(PC2) | 0.00483 | -              | --0.07976 | --             | 48    | --             | -1.18141 | --             | 2     | --             | -1.26634 | --             | 2.782     | 0              | 2.98201  | 0              | 0.74974 |
| Peak19(PC2) | 0.00483 | -              | --0.07913 | --             | 21    | --             | -1.31643 | --             | 6     | --             | -1.09707 | --             | 3.09997   | 0              | 2.5834   | 0              | 0.71807 |
| Peak20(PC2) | 0.00483 | -              | --0.07901 | --             | 35    | --             | -1.24467 | --             | 39    | --             | -1.23578 | --             | 2.93097   | 0              | 2.91005  | 0              | 0.76357 |
| Peak21(PC2) | 0.00483 | -              | --0.07322 | --             | 49    | --             | -1.58042 | --             | 22    | --             | 1.3003   | --             | 3.72159   | 0              | 3.06197  | 0              | 0.9454  |
| Peak22(PC2) | 0.00483 | -              | --0.07212 | --             | 26    | --             | -1.05846 | --             | 3     | --             | -1.16269 | --             | 2.49248   | 0              | 2.73793  | 0              | 0.55768 |
| Peak23(PC2) | 0.00483 | -              | --0.07104 | --             | 39    | --             | -1.45564 | --             | 26    | --             | -1.51739 | --             | 3.42776   | 0              | 3.57319  | 0              | 0.98585 |
| Peak24(PC2) | 0.00483 | -              | --0.04454 | --             | 10    | --             | 1.8007   | --             | 2     | --             | -2.44108 | --             | 4.24033   | 0              | 5.74831  | 0              | 1.23026 |
| Peak25(PC2) | 0.00483 | -              | --0.01197 | --             | 13    | --             | -1.08461 | --             | 24    | --             | 0.7814   | --             | 2.55407   | 0              | 1.84005  | 0              | 0.06375 |
| Peak26(PC2) | 0.00483 | -              | --0.00717 | --             | 11    | --             | -1.38732 | --             | 35    | --             | -2.24834 | --             | 3.2669    | 0              | 5.29444  | 0              | 0.14059 |
| Peak27(PC2) | 0.00483 | -              | --0.00591 | --             | 10    | --             | 14       | --             | 48    | --             | 0.5      | --             | -32.96748 | 0              | 1.17741  | 0              | 0.26002 |
| Peak28(PC2) | 0.00483 | -              | --0.00574 | --             | 20    | --             | -0.97835 | --             | 25    | --             | -0.75286 | --             | 2.30383   | 0              | 1.77284  | 0              | 0.02654 |
| Peak29(PC2) | 0.00483 | -              | --0.00402 | --             | 33    | --             | -1.00291 | --             | 44    | --             | -2.74131 | --             | 2.36168   | 0              | 6.45529  | 0              | 0.0695  |
| Peak30(PC2) | 0.00483 | -              | --0.00399 | --             | 8     | --             | 16.5     | --             | 7     | --             | -3.26426 | --             | -38.85453 | 0              | 7.68675  | 0              | 1.34868 |
| Peak31(PC2) | 0.00483 | -              | --0.00384 | --             | 19    | --             | -0.99048 | --             | 18    | --             | 1.5      | --             | 2.3324    | 0              | 3.53223  | 0              | 0.03586 |
| Peak32(PC2) | 0.00483 | -              | --0.0035  | --             | 41    | --             | -2.41875 | --             | 41    | --             | -2.12025 | --             | 5.69571   | 0              | 4.99281  | 0              | 0.11284 |
| Peak33(PC2) | 0.00483 | -              | --0.00214 | --             | 20    | --             | 10       | --             | 45    | --             | -6.28993 | --             | 23.5482   | 0              | 14.81164 | 0              | -0.845  |
| Peak34(PC2) | 0.00483 | -              | --0.0021  | --             | 12    | --             | -1.01556 | --             | 12    | --             | -1.52402 | --             | 2.39147   | 0              | 3.58878  | 0              | 0.02042 |
| Peak35(PC2) | 0.00483 | -              | --0.00205 | --             | 23    | --             | 11       | --             | 49    | --             | 1        | --             | -25.90302 | 0              | 2.35482  | 0              | 0.14172 |
| Peak36(PC2) | 0.00483 | -              | --0.00203 | --             | 12    | --             | -2.30303 | --             | 20    | --             | 1        | --             | 5.42323   | 0              | 2.35482  | 0              | 0.02944 |
| Peak37(PC2) | 0.00483 | -              | --0.00192 | --             | 27    | --             | 13.5     | --             | 45    | --             | 0.5      | --             | -31.79007 | 0              | 1.17741  | 0              | 0.08122 |
| Peak38(PC2) | 0.00483 | -              | --0.00172 | --             | 30    | --             | 12       | --             | 35    | --             | 2        | --             | -28.25784 | 0              | 4.70964  | 0              | 0.25974 |
| Peak39(PC2) | 0.00483 | -              | --0.00167 | --             | 34    | --             | -2.71388 | --             | 48    | --             | -0.44996 | --             | 6.39071   | 0              | 1.05957  | 0              | 0.01284 |
| Peak40(PC2) | 0.00483 | -              | --0.00162 | --             | 20    | --             | 16       | --             | 41    | --             | -2.79409 | --             | -37.67712 | 0              | 6.57958  | 0              | 0.45376 |
| Peak41(PC2) | 0.00483 | -              | --        | --             | --    | --             | 0        | --             | --    | --             | 0        | --             | 0         | 0              | 0        | 0              | --      |

|             |         |    |    |    |    |    |   |    |    |    |   |    |   |   |   |   |    |
|-------------|---------|----|----|----|----|----|---|----|----|----|---|----|---|---|---|---|----|
| Peak42(PC2) | 0.00483 | -- | -- | -- | -- | -- | 0 | -- | -- | -- | 0 | -- | 0 | 0 | 0 | 0 | -- |
|-------------|---------|----|----|----|----|----|---|----|----|----|---|----|---|---|---|---|----|

### 3. Figure S3 / Table S3: More information for Figures 4-5

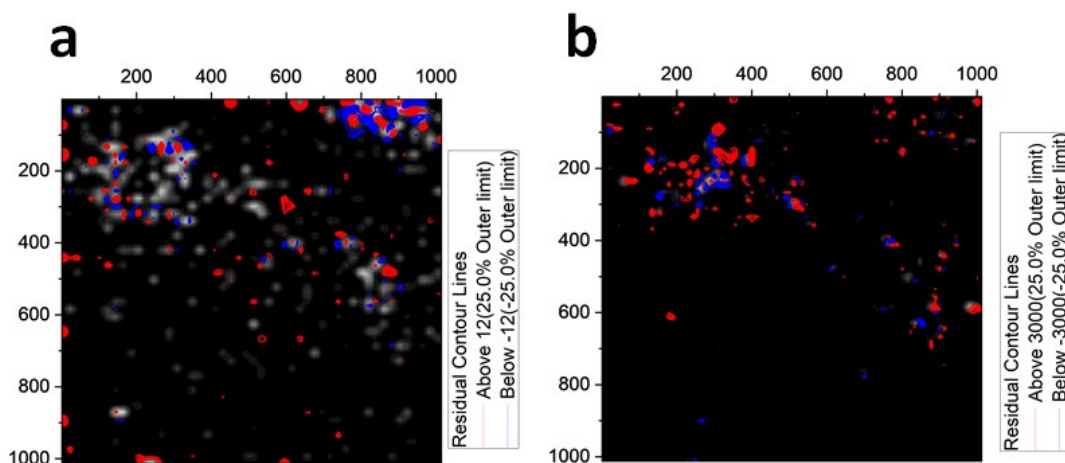

Figure S3. Fitting residue for Figures 4-5. (a) is for Figure 4 while (b) for Figure 5.

Due to the weak signal and the computation complexity, there are lots of spots that are not picked up for fitting in (a). This limit also corresponds with the image resolution issue discussed in the main manuscript. That is, we must balance among the high resolution imaging (to capture nanoplastics down to  $< 100$  nm), the scanning duration, the signal intensity and the computation capacity etc.

This fitting residue in (b) looks better than (a), because the logic-based algorithm has filtered lots of noise towards fitting.

Table S3. Parameters Summary for the fitting peaks (all data for the  $x \times y$  axis of  $1014 \times 1014$ , after removing boundary from  $1024 \times 1024$  of the image with size of  $2 \mu\text{m} \times 2 \mu\text{m}$ ). The highlight (in yellow) marks the peaks for Figures 3(i, j).

|                | z0      |                | A         |                | xc        |                | w1       |                                 | yc               |                | w2       |                | FWHMx    |                | FWHMy    |                | FWHMz   |                |  |
|----------------|---------|----------------|-----------|----------------|-----------|----------------|----------|---------------------------------|------------------|----------------|----------|----------------|----------|----------------|----------|----------------|---------|----------------|--|
|                | Value   | Standard Error | Value     | Standard Error | Value     | Standard Error | Value    | Standard Error                  | Value            | Standard Error | Value    | Standard Error | Value    | Standard Error | Value    | Standard Error | Value   | Standard Error |  |
| Peak1(?? VM1)  | 0.84463 | --             | 77.79409  | 0.62121        | 296.46936 | 0.19256        | 14.36979 |                                 | 0.1826275.75727  | 0.0884         | 9.71212  | 0.09074        | 33.83826 | 0.43           | 22.87029 |                | 0.21368 |                |  |
| Peak2(?? VM1)  | 0.84463 | --             | 201.02913 | 2.58203        | 306.43863 | 0.21125        | 9.38256  |                                 | 0.13613194.27497 | 0.05477        | 9.98574  | 0.05362        | 22.09423 | 0.32057        | 23.51462 |                | 0.12627 |                |  |
| Peak3(?? VM1)  | 0.84463 | --             | 200.03753 | 2.92847        | 287.10754 | 0.21358        | 8.94307  |                                 | 0.11009194.59261 | 0.03931        | 9.03248  | 0.04273        | 21.05932 | 0.25925        | 21.26987 |                | 0.10063 |                |  |
| Peak4(?? VM1)  | 0.84463 | --             | 201.62757 | 2.50669        | 164.73751 | 0.19285        | 9.16101  |                                 | 0.10814870.76214 | 0.03712        | 9.05154  | 0.03699        | 21.57254 | 0.25465        | 21.31474 |                | 0.08711 |                |  |
| Peak5(?? VM1)  | 0.84463 | --             | 209.41154 | 2.2406         | 144.58551 | 0.19875        | 9.5833   |                                 | 0.11113871.04875 | 0.03468        | 9.05904  | 0.03455        | 22.56694 | 0.26169        | 21.33242 |                | 0.08135 |                |  |
| Peak6(?? VM1)  | 0.84463 | --             | 0.79294   | 0.28061        | 721.36923 |                | --       | 1.2202E962740473.47828870.97107 | 0.34095          | 0.64918        | 0.24376  | 2.87336E96     |          | 0              | 1.5287   |                | 0.57402 |                |  |
| Peak7(?? VM1)  | 0.84463 | --             | 227.66274 | 0.51665        | 253.11224 | 0.06906        | 21.91385 |                                 | 0.0861113.38731  | 0.02517        | 9.65815  | 0.02614        | 51.60318 | 0.20276        | 22.7432  |                | 0.06155 |                |  |
| Peak8(?? VM1)  | 0.84463 | --             | 185.8738  | 0.407          | 294.081   | 0.07374        | 24.0278  |                                 | 0.06376140.14811 | 0.05072        | 14.73689 | 0.04891        | 56.58113 | 0.15015        | 34.70272 |                | 0.11518 |                |  |
| Peak9(?? VM1)  | 0.84463 | --             | 198.89545 | 0.80012        | 348.54575 | 0.05517        | 10.75032 |                                 | 0.05261153.70381 | 0.03698        | 7.74636  | 0.03678        | 25.31506 | 0.12389        | 18.24129 |                | 0.08661 |                |  |
| Peak10(?? VM1) | 0.84463 | --             | 189.27429 | 0.55638        | 787.43412 | 0.03842        | 18.56866 |                                 | 0.04165          | 1              | 0.42264  | 49.21518       | 0.26506  | 43.72584       | 0.09809  | 115.8929       |         | 0.62417        |  |
| Peak11(?? VM1) | 0.84463 | --             | 206.89683 | 0.64419        | 267.74252 | 0.05944        | 9.85968  |                                 | 0.05047257.16921 | 0.09251        | 16.29867 | 0.07206        | 23.21776 | 0.11885        | 38.38044 |                | 0.1697  |                |  |
| Peak12(?? VM1) | 0.84463 | --             | 230.19136 | 0.44594        | 908.92817 | 0.03839        | 18.94744 |                                 | 0.04178          | 24.43127       | 0.02939  | 15.10098       | 0.0339   | 44.61781       | 0.0984   | 35.56009       |         | 0.07983        |  |
| Peak13(?? VM1) | 0.84463 | --             | 207.64874 | 0.88151        | 902.69392 | 0.03874        | 8.38493  |                                 | 0.03865          | 72.06712       | 0.03616  | 7.7834         | 0.03673  | 19.745         | 0.09102  | 18.3285        |         | 0.08649        |  |
| Peak14(?? VM1) | 0.84463 | --             | 217.52066 | 0.76874        | 801.13168 | 0.06284        | 10.33094 |                                 | 0.05643481.59121 | 0.03326        | 9.00434  | 0.03404        | 24.32751 | 0.13289        | 21.20361 |                | 0.08016 |                |  |
| Peak15(?? VM1) | 0.84463 | --             | 211.28785 | 0.58974        | 323.48852 | 0.06709        | 14.3226  |                                 | 0.05432170.68749 | 0.06021        | 12.35155 | 0.05818        | 33.72714 | 0.12793        | 29.08568 |                | 0.137   |                |  |
| Peak16(?? VM1) | 0.84463 | --             | 212.13551 | 0.65419        | 46.26689  | 0.04065        | 13.13297 |                                 | 0.04053          | 31.16459       | 0.02763  | 8.8785         | 0.02787  | 30.92578       | 0.09545  | 20.90726       |         | 0.06562        |  |
| Peak17(?? VM1) | 0.84463 | --             | 227.0082  | 0.48885        | 134.11733 | 0.04443        | 20.40636 |                                 | 0.04487135.10125 | 0.02517        | 10.53494 | 0.02702        | 48.05331 | 0.10565        | 24.80789 |                | 0.06362 |                |  |
| Peak18(?? VM1) | 0.84463 | --             | 238.61509 | 0.47604        | 837.60499 | 0.02921        | 12.52272 |                                 | 0.02972          | 35.45709       | 0.03763  | 18.48326       | 0.04153  | 29.48874       | 0.06999  | 43.52475       |         | 0.09779        |  |
| Peak19(?? VM1) | 0.84463 | --             | 231.62447 | 0.49625        | 871.81463 | 0.03911        | 15.5829  |                                 | 0.0412           | 87.08117       | 0.03078  | 13.56722       | 0.02973  | 36.69492       | 0.09703  | 31.94837       |         | 0.07001        |  |
| Peak20(?? VM1) | 0.84463 | --             | 208.19887 | 0.70558        | 203.44462 | 0.03909        | 11.32235 |                                 | 0.04044277.05234 | 0.03103        | 9.00253  | 0.03156        | 26.66209 | 0.09522        | 21.19933 |                | 0.07433 |                |  |
| Peak21(?? VM1) | 0.84463 | --             | 241.92333 | 0.61352        | 328.44086 | 0.02345        | 8.93462  |                                 | 0.02353224.03346 | 0.04485        | 15.58428 | 0.04783        | 21.03942 | 0.05542        | 36.69818 |                | 0.11263 |                |  |
| Peak22(?? VM1) | 0.84463 | --             | 217.55524 | 0.61021        | 146.68063 | 0.03943        | 13.41466 |                                 | 0.04109172.32238 | 0.03469        | 10.81283 | 0.03837        | 31.58911 | 0.09675        | 25.46226 |                | 0.09036 |                |  |
| Peak23(?? VM1) | 0.84463 | --             | 225.79125 | 0.61896        | 335.67001 | 0.04141        | 14.79251 |                                 | 0.04194338.37644 | 0.02509        | 8.96501  | 0.0255         | 34.8337  | 0.09875        | 21.11099 |                | 0.06004 |                |  |
| Peak24(?? VM1) | 0.84463 | --             | 194.83997 | 0.56467        | 842.21813 | 0.04287        | 12.48565 |                                 | 0.04247459.92604 | 0.03924        | 12.822   | 0.03877        | 29.40146 | 0.1            | 30.1935  |                | 0.09131 |                |  |
| Peak25(?? VM1) | 0.84463 | --             | 207.35605 | 0.59941        | 513.28763 | 0.06201        | 16.01098 |                                 | 0.05429297.35153 | 0.03091        | 8.96203  | 0.02901        | 37.70297 | 0.12784        | 21.10396 |                | 0.06832 |                |  |
| Peak26(?? VM1) | 0.84463 | --             | 215.13781 | 0.78955        | 21.19747  | 0.03301        | 8.99398  |                                 | 0.03367215.51049 | 0.03276        | 8.95805  | 0.03288        | 21.17921 | 0.07928        | 21.0946  |                | 0.07742 |                |  |
| Peak27(?? VM1) | 0.84463 | --             | 214.24278 | 0.77834        | 246.75905 | 0.03445        | 9.19847  |                                 | 0.03463215.76532 | 0.03362        | 9.07305  | 0.0342         | 21.66073 | 0.08154        | 21.3654  |                | 0.08053 |                |  |
| Peak28(?? VM1) | 0.84463 | --             | 162.83867 | 1.39701        | 246.91474 | 0.04502        | 7.95292  |                                 | 0.05828321.69739 | 0.08003        | 13.00036 | 0.0877         | 18.72769 | 0.13723        | 30.61352 |                | 0.20651 |                |  |
| Peak29(?? VM1) | 0.84463 | --             | 187.64088 | 0.48933        | 523.02378 | 0.05851        | 21.95706 |                                 | 0.06356236.57401 | 0.0257         | 9.93551  | 0.02593        | 51.70492 | 0.14968        | 23.39634 |                | 0.06106 |                |  |
| Peak30(?? VM1) | 0.84463 | --             | 175.96494 | 0.58123        | 621.58315 | 0.04791        | 14.52107 |                                 | 0.04813400.28179 | 0.03375        | 10.21828 | 0.03399        | 34.19452 | 0.11333        | 24.0622  |                | 0.08003 |                |  |
| Peak31(?? VM1) | 0.84463 | --             | 181.58767 | 0.78875        | 512.73692 | 0.0388         | 8.93304  |                                 | 0.03882          | 625.1489       | 0.03883  | 8.93931        | 0.03884  | 21.0357        | 0.09141  | 21.05047       |         | 0.09147        |  |
| Peak32(?? VM1) | 0.84463 | --             | 172.28654 | 0.67171        | 104.83077 | 0.14414        | 15.07768 |                                 | 0.1518           | 194.16146      | 0.04132  | 9.68015        | 0.03826  | 35.50522       | 0.35746  | 22.79502       |         | 0.09009        |  |
| Peak33(?? VM1) | 0.84463 | --             | 174.44708 | 0.80098        | 861.4564  | 0.06487        | 9.47709  |                                 | 0.05985584.41706 | 0.04476        | 8.93093  | 0.04488        | 22.31685 | 0.14094        | 21.03073 |                | 0.10567 |                |  |
| Peak34(?? VM1) | 0.84463 | --             | 186.26434 | 0.68464        | 820.00223 | 0.03478        | 8.42879  |                                 | 0.03275498.81048 | 0.11238        | 16.88241 | 0.09068        | 19.84828 | 0.07713        | 39.75504 |                | 0.21354 |                |  |
| Peak35(?? VM1) | 0.84463 | --             | 154.1     | 0.61164        | 143.3926  | 0.03534        | 9.79841  |                                 | 0.03966263.49944 | 0.08704        | 21.69103 | 0.10031        | 23.0735  | 0.09338        | 51.07847 |                | 0.23621 |                |  |
| Peak36(?? VM1) | 0.84463 | --             | 173.9849  | 0.75016        | 492.22917 | 0.03876        | 9.00624  |                                 | 0.03879196.01932 | 0.04254        | 9.84334  | 0.04288        | 21.20809 | 0.09133        | 23.1793  |                | 0.10098 |                |  |
| Peak37(?? VM1) | 0.84463 | --             | 163.78687 | 0.71953        | 62.93611  | 0.06268        | 10.3121  |                                 | 0.06589193.92829 | 0.04631        | 10.01151 | 0.0461         | 24.28313 | 0.15517        | 23.57531 |                | 0.10855 |                |  |
| Peak38(?? VM1) | 0.84463 | --             | 167.02102 | 0.73176        | 534.65756 | 0.0486         | 10.23429 |                                 | 0.04787317.35617 | 0.05548        | 9.41495  | 0.05386        | 24.0999  | 0.11272        | 22.1705  |                | 0.12683 |                |  |
| Peak39(?? VM1) | 0.84463 | --             | 171.14086 | 0.60348        | 20.89905  | 0.03564        | 10.01959 |                                 | 0.03727569.47082 | 0.04946        | 13.97462 | 0.05031        | 23.59434 | 0.08777        | 32.90773 |                | 0.11848 |                |  |
| Peak40(?? VM1) | 0.84463 | --             | 164.23297 | 0.52247        | 985.40149 | 0.03733        | 11.60571 |                                 | 0.03893113.88232 | 0.05115        | 16.13007 | 0.05224        | 27.32936 | 0.09168        | 37.98341 |                | 0.12302 |                |  |



#### 4. Table S4: More information for Figure 5

Table S4. Parameters Summary for the fitting peaks (all data for the  $x \times y$  axis of  $1014 \times 1014$ , after removing boundary from  $1024 \times 1024$  of the image with size of  $2 \mu\text{m} \times 2 \mu\text{m}$ )

|                 | z0        |                | A           |                | xc    |                | w1         |                | yc    |                | w2       |                | FWHMx       |                | FWHMy    |                |
|-----------------|-----------|----------------|-------------|----------------|-------|----------------|------------|----------------|-------|----------------|----------|----------------|-------------|----------------|----------|----------------|
|                 | Value     | Standard Error | Value       | Standard Error | Value | Standard Error | Value      | Standard Error | Value | Standard Error | Value    | Standard Error | Value       | Standard Error | Value    | Standard Error |
| Peak1(Sheet 1)  | 179.15111 | 0.44221        | 40357.6704  | 62.57202       | 297   | 0.04098        | 6.97647    | 0.03663        | 233   | 0.06213        | 9.26526  | 0.05799        | 16.42833    | 0.08626        | 21.81801 | 0.13655        |
| Peak2(Sheet 1)  | 179.15111 | 0.44221        | 48004.42713 | --             | 284   | 0.03499        | 7.79692    | 0.03124        | 234   | 0.04032        | 8.84231  | 0.04087        | 18.36035    | 0.07357        | 20.82205 | 0.09624        |
| Peak3(Sheet 1)  | 179.15111 | 0.44221        | 53585.94757 | 218.217        | 265   | 0.03005        | 8.91765    | 0.03319        | 256   | 0.03037        | 8.65814  | 0.03449        | 20.99945    | 0.07815        | 20.38836 | 0.08123        |
| Peak4(Sheet 1)  | 179.15111 | 0.44221        | 52584.25652 | 197.52463      | 982   | 0.02832        | 9.14197    | 0.03075        | 584   | 0.02721        | 8.47805  | 0.02791        | 21.52769    | 0.07241        | 19.96428 | 0.06573        |
| Peak5(Sheet 1)  | 179.15111 | 0.44221        | 34137.22974 | 253.99116      | 313   | 0.0788         | 7.64874    | 0.07398        | 216   | 0.16574        | 7.69689  | 0.14638        | 18.01142    | 0.1742         | 18.1248  | 0.34469        |
| Peak6(Sheet 1)  | 179.15111 | 0.44221        | 41580.3121  | 208.92286      | 326   | 0.05331        | 9.83388    | 0.05099        | 233   | 0.05669        | 9.96324  | 0.05025        | 23.15702    | 0.12008        | 23.46164 | 0.11832        |
| Peak7(Sheet 1)  | 179.15111 | 0.44221        | 37393.91565 | 219.55028      | 384   | 0.03841        | 8.85732    | 0.04225        | 175   | 0.03818        | 8.78351  | 0.04187        | 20.85738    | 0.09949        | 20.68358 | 0.0986         |
| Peak8(Sheet 1)  | 179.15111 | 0.44221        | 43212.45222 | 185.93137      | 838   | 0.03962        | 7.9299     | 0.03841        | 625   | 0.02764        | 5.52834  | 0.02674        | 18.67349    | 0.09045        | 13.01824 | 0.06296        |
| Peak9(Sheet 1)  | 179.15111 | 0.44221        | 33765.2093  | 209.61686      | 60    | 0.04404        | 9.87183    | 0.04886        | 236   | 0.04076        | 9.13833  | 0.04538        | 23.24639    | 0.11505        | 21.51912 | 0.10686        |
| Peak10(Sheet 1) | 179.15111 | 0.44221        | 33691.32798 | 243.90051      | 900   | 0.0361         | 4.14215    | 0.0387         | 441   | 0.06688        | 7.00466  | 0.0607         | 9.75401     | 0.09112        | 16.49472 | 0.14295        |
| Peak11(Sheet 1) | 179.15111 | 0.44221        | 30392.26752 | 194.10424      | 511   | 0.05197        | 10.75636   | 0.05811        | 297   | 0.04459        | 9.07727  | 0.04872        | 25.32929    | 0.13684        | 21.37533 | 0.11473        |
| Peak12(Sheet 1) | 179.15111 | 0.44221        | 24770.4869  | 219.29031      | 306   | 0.05609        | 6.49132    | 0.05887        | 182   | 0.06989        | 8.18059  | 0.07742        | 15.28589    | 0.13864        | 19.26383 | 0.1823         |
| Peak13(Sheet 1) | 179.15111 | 0.44221        | 39587.81232 | 347.2641       | 204   | 0.03831        | 2.55242    | 0.03979        | 31    | 0.04266        | 3.4361   | 0.04744        | 6.01049     | 0.09369        | 8.0914   | 0.11172        |
| Peak14(Sheet 1) | 179.15111 | 0.44221        | 15606.17611 | 230.53184      | 195   | 0.05661        | 4.81149    | 0.06231        | 277   | 0.17682        | 13.02471 | 0.19817        | 11.33019    | 0.14673        | 30.67084 | 0.46665        |
| Peak15(Sheet 1) | 179.15111 | 0.44221        | 27777.95144 | 223.75394      | 758   | 0.08737        | 9.18206    | 0.06369        | 399   | 0.09369        | 7.78662  | 0.07297        | 21.62209    | 0.14999        | 18.3361  | 0.17183        |
| Peak16(Sheet 1) | 179.15111 | 0.44221        | 20370.6793  | 239.73185      | 446   | 0.03224        | 2.42634    | 0.03278        | 277   | 0.15904        | 11.63123 | 0.15039        | 5.71359     | 0.07718        | 27.38945 | 0.35414        |
| Peak17(Sheet 1) | 179.15111 | 0.44221        | 16462.1786  | 376.67008      | 347   | 0.08801        | 4.98262    | 0.09521        | 163   | 0.08688        | 4.92513  | 0.09403        | 11.73317    | 0.22421        | 11.59778 | 0.22143        |
| Peak18(Sheet 1) | 179.15111 | 0.44221        | 22253.97114 | 195.32811      | 879   | 0.0724         | 8.70123    | 0.07439        | 584   | 0.06499        | 7.62383  | 0.06387        | 20.48982    | 0.17517        | 17.95274 | 0.15041        |
| Peak19(Sheet 1) | 179.15111 | 0.44221        | 31847.16419 | 1428.3237      | 244   | 0.05463        | 0.87806    | 0.04981        | 206   | 0.05217        | 0.53769  | 0.02873        | 2.06767     | 0.11729        | 1.26615  | 0.06766        |
| Peak20(Sheet 1) | 179.15111 | 0.44221        | 23557.19107 | 206.37754      | 429   | 0.08599        | 6.93947    | 0.08253        | 236   | 0.04353        | 5.53738  | 0.04173        | 16.3412     | 0.19435        | 8.32989  | 0.09826        |
| Peak21(Sheet 1) | 179.15111 | 0.44221        | 15816.3192  | 401.51925      | 489   | 0.18228        | 4.60541    | 0.16613        | 277   | 0.04546        | 1.15825  | 0.04233        | 10.84491    | 0.39121        | 2.72747  | 0.09967        |
| Peak22(Sheet 1) | 179.15111 | 0.44221        | 25545.20819 | 211.52851      | 818   | 0.0589         | 9.33909    | 0.06408        | 502   | 0.05338        | 8.44061  | 0.0579         | 21.99188    | 0.15089        | 19.87611 | 0.13635        |
| Peak23(Sheet 1) | 179.15111 | 0.44221        | 16813.53053 | 907627.50944   | 305   | 2332840.76556  | 1.40229E-4 | 3361106.67002  | 99    | --             | 0.02228  | --             | -3.30214E-4 | 7914801.36304  | 0.05245  | --             |
| Peak24(Sheet 1) | 179.15111 | 0.44221        | 17463.03996 | 172.81691      | 255   | 0.06751        | 7.2623     | 0.06902        | 220   | 0.11656        | 11.6294  | 0.11941        | 17.10142    | 0.16254        | 27.38514 | 0.28119        |
| Peak25(Sheet 1) | 179.15111 | 0.44221        | 15020.2359  | 188.00367      | 293   | 0.17654        | 4.29804    | 0.17776        | 208   | 0.10296        | 2.47505  | 0.10355        | 10.12112    | 0.41859        | 5.8283   | 0.24385        |
| Peak26(Sheet 1) | 179.15111 | 0.44221        | 1254.72558  | 796.61913      | 252   | --             | 1.71966    | 1.62999        | 228   | 0.75612        | 1.72175  | 1.7321         | 4.04949     | 3.83832        | 4.05441  | 4.07878        |
| Peak27(Sheet 1) | 179.15111 | 0.44221        | 17199.32266 | 198.75532      | 125   | 0.09003        | 9.36792    | 0.09897        | 181   | 0.07895        | 8.40373  | 0.08391        | 22.05977    | 0.23305        | 19.78928 | 0.1976         |
| Peak28(Sheet 1) | 179.15111 | 0.44221        | 16157.67471 | 2156.42749     | 308   | 0.12902        | 0.53645    | 0.07211        | 93    | 3653.82018     | 0.18693  | --             | 1.26324     | 0.16981        | 0.4402   | --             |
| Peak29(Sheet 1) | 179.15111 | 0.44221        | 16608.39143 | 154.86754      | 293   | 0.07615        | 9.60852    | 0.08582        | 133   | 0.13743        | 19.13259 | 0.13634        | 22.62635    | 0.20209        | 45.05381 | 0.32105        |
| Peak30(Sheet 1) | 179.15111 | 0.44221        | 16732.29254 | 250.58688      | 302   | 0.56988        | 9.06135    | 0.32595        | 206   | 0.09285        | 4.36825  | 0.10389        | 21.33784    | 0.76756        | 10.28644 | 0.24464        |
| Peak31(Sheet 1) | 179.15111 | 0.44221        | 13027.47054 | 228.61752      | 244   | 0.1846         | 12.12558   | 0.18448        | 100   | 0.07004        | 4.67558  | 0.07798        | 28.55355    | 0.43442        | 11.01016 | 0.18363        |
| Peak32(Sheet 1) | 179.15111 | 0.44221        | 2042.69001  | 316.80541      | 290   | 70.26566       | 0.23106    | 13.99678       | 139   | 2.81888        | 28.20199 | 3.7799         | 0.54411     | 32.95989       | 66.41061 | 8.90098        |
| Peak33(Sheet 1) | 179.15111 | 0.44221        | 14217.99325 | 267.31008      | 767   | 0.04098        | 2.74998    | 0.04389        | 51    | 0.33738        | 16.58806 | 0.26398        | 6.47571     | 0.10335        | 39.0619  | 0.62163        |
| Peak34(Sheet 1) | 179.15111 | 0.44221        | 20534.1791  | 353.95537      | 900   | 0.14075        | 8.95677    | 0.14634        | 471   | 0.03435        | 2.17574  | 0.0352         | 21.09159    | 0.34461        | 5.12349  | 0.08288        |
| Peak35(Sheet 1) | 179.15111 | 0.44221        | 13340.96426 | 173.88944      | 233   | 0.21717        | 6.11393    | 0.1853         | 184   | 0.08038        | 2.81689  | 0.09726        | 14.3972     | 0.43635        | 6.63328  | 0.22904        |
| Peak36(Sheet 1) | 179.15111 | 0.44221        | 13524.96781 | 262.69184      | 243   | 0.1498         | 7.84447    | 0.14235        | 180   | 0.13528        | 7.33441  | 0.1089         | 18.47232    | 0.3352         | 17.27121 | 0.25645        |
| Peak37(Sheet 1) | 179.15111 | 0.44221        | 21522.01776 | 282.49207      | 150   | 0.04776        | 3.59188    | 0.04817        | 276   | 0.12098        | 7.28001  | 0.1217         | 8.45824     | 0.11342        | 17.1431  | 0.28659        |
| Peak38(Sheet 1) | 179.15111 | 0.44221        | 20681.96388 | 398.34179      | 982   | 0.12655        | 8.4446     | 0.13782        | 122   | 0.04206        | 3.01706  | 0.04679        | 19.88551    | 0.32453        | 7.10464  | 0.11018        |
| Peak39(Sheet 1) | 179.15111 | 0.44221        | 3122.86282  | 2994.22441     | 511   | 0.93996        | 6.7669     | 0.88959        | 239   | 1.63681        | 7.99597  | 1.60006        | 15.93484    | 2.09482        | 18.82907 | 3.76785        |

|               |           |         |             |            |     |           |           |          |     |         |            |         |           |          |            |         |
|---------------|-----------|---------|-------------|------------|-----|-----------|-----------|----------|-----|---------|------------|---------|-----------|----------|------------|---------|
| Peak40(Shetl) | 179.15111 | 0.44221 | 8533.59102  | 2684.24122 | 511 | 0.31218   | 7.26941   | 0.24909  | 233 | 1.87204 | 10.30416   | 0.43588 | 17.11814  | 0.58655  | 24.26443   | 1.02641 |
| Peak41(Shetl) | 179.15111 | 0.44221 | 1985.69405  | 806.22414  | 869 | 1.24537   | 2.96868   | 0.87514  | 103 | 0.44579 | 0.79212    | 0.30928 | 6.99071   | 2.0608   | 1.8653     | 0.72829 |
| Peak42(Shetl) | 179.15111 | 0.44221 | 16897.60957 | 308.85855  | 859 | 0.2515    | 9.7378    | 0.20359  | 101 | 0.07892 | 3.80553    | 0.06118 | 22.93077  | 0.47941  | 8.96133    | 0.14406 |
| Peak43(Shetl) | 179.15111 | 0.44221 | 15137.732   | 381.95199  | 388 | 0.13771   | 6.85132   | 0.14671  | 277 | 0.06627 | 3.31034    | 0.07076 | 16.13362  | 0.34548  | 7.79524    | 0.16662 |
| Peak44(Shetl) | 179.15111 | 0.44221 | 15984.64231 | 240.6303   | 153 | 0.07376   | 4.80275   | 0.08099  | 318 | 0.13218 | 9.99118    | 0.13806 | 11.30962  | 0.19072  | 23.52742   | 0.3251  |
| Peak45(Shetl) | 179.15111 | 0.44221 | 18730.74782 | 343.92571  | 613 | 0.12187   | 7.9642    | 0.12808  | 473 | 0.04815 | 3.16227    | 0.05083 | 18.75425  | 0.30161  | 7.44657    | 0.11968 |
| Peak46(Shetl) | 179.15111 | 0.44221 | 20103.65364 | 357.37461  | 163 | 0.12649   | 7.36043   | 0.1395   | 264 | 0.052   | 3.74213    | 0.05491 | 17.33249  | 0.3285   | 8.81204    | 0.1293  |
| Peak47(Shetl) | 179.15111 | 0.44221 | 14312.41571 | 242.5544   | 900 | 0.13489   | 9.24424   | 0.14354  | 639 | 0.07586 | 5.20925    | 0.0792  | 21.76852  | 0.33802  | 12.26684   | 0.18649 |
| Peak48(Shetl) | 179.15111 | 0.44221 | 20649.0502  | 284.28276  | 275 | 0.04167   | 2.68486   | 0.04435  | 133 | 0.12089 | 7.91589    | 0.12702 | 6.32237   | 0.10443  | 18.64049   | 0.29911 |
| Peak49(Shetl) | 179.15111 | 0.44221 | 16194.66975 | 268.95787  | 850 | 0.05454   | 2.6856    | 0.06321  | 461 | 0.29776 | 9.46392    | 0.24261 | 6.3241    | 0.14886  | 22.28583   | 0.57131 |
| Peak50(Shetl) | 179.15111 | 0.44221 | 19630.70582 | 279.83361  | 892 | 0.0595    | 3.84801   | 0.05872  | 564 | 0.10695 | 6.14807    | 0.11506 | 9.06138   | 0.13828  | 14.47759   | 0.27094 |
| Peak51(Shetl) | 179.15111 | 0.44221 | 17676.96292 | 333.30115  | 880 | 0.26883   | 9.22468   | 0.22466  | 105 | 0.05984 | 2.93407    | 0.05504 | 21.72247  | 0.52903  | 6.90921    | 0.1296  |
| Peak52(Shetl) | 179.15111 | 0.44221 | 4977.40918  | 261.032    | 848 | 0.29051   | 6.45913   | 0.2812   | 455 | 0.61322 | 7.28701    | 0.30053 | 15.21009  | 0.66218  | 17.1596    | 0.7077  |
| Peak53(Shetl) | 179.15111 | 0.44221 | 11649.69564 | 239.72193  | 910 | 0.05869   | 1.69593   | 0.0588   | 442 | 0.27247 | 8.83729    | 0.31987 | 3.99361   | 0.13846  | 20.81022   | 0.75325 |
| Peak54(Shetl) | 179.15111 | 0.44221 | 5191.29985  | 108.81791  | 901 | 0.66998   | 10.47581  | 0.27043  | 431 | 0.12187 | 1.96452    | 0.13852 | 24.66865  | 0.63681  | 4.6261     | 0.3262  |
| Peak55(Shetl) | 179.15111 | 0.44221 | 22668.67382 | 187.58282  | 142 | 0.05996   | 2.53421   | 0.05431  | 318 | 0.07599 | 3.63479    | 0.07362 | 5.96762   | 0.1279   | 8.55929    | 0.17335 |
| Peak56(Shetl) | 179.15111 | 0.44221 | 15748.69408 | 257.00221  | 30  | 0.07437   | 5.77867   | 0.08077  | 92  | 0.11116 | 8.69501    | 0.1197  | 13.60773  | 0.1902   | 20.47517   | 0.28186 |
| Peak57(Shetl) | 179.15111 | 0.44221 | 16557.60602 | 383.29511  | 551 | 0.12346   | 6.48659   | 0.13035  | 351 | 0.06049 | 3.17709    | 0.06398 | 15.27476  | 0.30696  | 7.48149    | 0.15066 |
| Peak58(Shetl) | 179.15111 | 0.44221 | 11936.58624 | 226.86818  | 258 | 0.07488   | 4.75791   | 0.08114  | 299 | 0.20688 | 12.75465   | 0.2326  | 11.20402  | 0.19107  | 30.0349    | 0.54774 |
| Peak59(Shetl) | 179.15111 | 0.44221 | 9515.91997  | 203.05046  | 726 | 0.31456   | 4.50183   | 0.21349  | 51  | 0.10216 | 1.9766     | 0.10414 | 10.601    | 0.50274  | 4.65453    | 0.24523 |
| Peak60(Shetl) | 179.15111 | 0.44221 | 14307.91324 | 228.08395  | 159 | 0.0971    | 6.74733   | 0.1077   | 177 | 0.12014 | 8.78984    | 0.12064 | 15.88875  | 0.25362  | 20.69848   | 0.28408 |
| Peak61(Shetl) | 179.15111 | 0.44221 | 14259.10204 | 297.15187  | 40  | 0.13195   | 5.32297   | 0.12716  | 18  | 0.07669 | 3.1105     | 0.07392 | 12.53463  | 0.29943  | 7.32467    | 0.17408 |
| Peak62(Shetl) | 179.15111 | 0.44221 | 1234.05319  | 207.3265   | 303 | 0.81482   | 4.96921   | 0.65004  | 119 | 0.63036 | 4.91718    | 0.56846 | 11.70159  | 1.53074  | 11.57907   | 1.33863 |
| Peak63(Shetl) | 179.15111 | 0.44221 | 13215.01828 | 299.669    | 419 | 0.15617   | 8.38197   | 0.16174  | 124 | 0.07627 | 4.19826    | 0.08122 | 19.73804  | 0.38087  | 9.88614    | 0.19125 |
| Peak64(Shetl) | 179.15111 | 0.44221 | 7809.96947  | 216.29571  | 880 | 0.40665   | 7.16852   | 0.31071  | 549 | 0.23692 | 4.91661    | 0.19922 | 16.88058  | 0.73166  | 11.57773   | 0.46913 |
| Peak65(Shetl) | 179.15111 | 0.44221 | 9445.1239   | 1501.70448 | 757 | 1.04466   | 6.95624   | 0.37155  | 125 | 0.30705 | 4.82548    | 0.14087 | 16.38069  | 0.87494  | 11.36314   | 0.33172 |
| Peak66(Shetl) | 179.15111 | 0.44221 | 10481.11498 | 140.40004  | 277 | 0.21256   | 8.98681   | 0.21175  | 185 | 0.09998 | 4.71223    | 0.09206 | 21.16231  | 0.49864  | 11.09645   | 0.21679 |
| Peak67(Shetl) | 179.15111 | 0.44221 | 8677.30037  | 232.80326  | 194 | 0.18356   | 5.13301   | 0.1853   | 33  | 0.2165  | 8.24144    | 0.2177  | 12.08733  | 0.43634  | 19.40711   | 0.51265 |
| Peak68(Shetl) | 179.15111 | 0.44221 | 9717.18237  | 334.66624  | 214 | 0.10013   | 2.97517   | 0.10857  | 31  | 0.25496 | 7.60299    | 0.24231 | 7.006     | 0.25566  | 17.90368   | 0.57061 |
| Peak69(Shetl) | 179.15111 | 0.44221 | 5441.1546   | 66.55161   | 388 | 0.29298   | 4.72911   | 0.26473  | 236 | 0.71096 | 9.32265    | 0.61481 | 11.1362   | 0.62339  | 21.95316   | 1.44776 |
| Peak70(Shetl) | 179.15111 | 0.44221 | 11606.59205 | 116.83217  | 301 | 0.1242    | 2.64706   | 0.11644  | 318 | 0.13836 | 2.89248    | 0.12547 | 6.23336   | 0.2742   | 6.81128    | 0.29546 |
| Peak71(Shetl) | 179.15111 | 0.44221 | 9396.5955   | 194.52873  | 169 | 0.09891   | 2.84948   | 0.10303  | 236 | 0.30303 | 8.49942    | 0.32735 | 6.71001   | 0.24263  | 20.01461   | 0.77084 |
| Peak72(Shetl) | 179.15111 | 0.44221 | 9000.63211  | 191.99253  | 246 | 0.25073   | 9.08804   | 0.23664  | 331 | 0.10873 | 4.05869    | 0.1027  | 21.40069  | 0.55725  | 9.55748    | 0.24183 |
| Peak73(Shetl) | 179.15111 | 0.44221 | 6870.27359  | 309.88088  | 183 | 0.28206   | 6.58119   | 0.30326  | 188 | 0.18706 | 4.60103    | 0.19395 | 15.49752  | 0.71412  | 10.83459   | 0.45671 |
| Peak74(Shetl) | 179.15111 | 0.44221 | 8838.93711  | 380.43971  | 935 | 0.15369   | 3.56496   | 0.15345  | 400 | 0.17869 | 3.99381    | 0.17212 | 8.39484   | 0.36134  | 9.40469    | 0.40532 |
| Peak75(Shetl) | 179.15111 | 0.44221 | 6552.03437  | 421.7744   | 916 | 0.16172   | 2.14196   | 0.19897  | 111 | 0.36564 | 3.97676    | 0.33851 | 5.04394   | 0.46853  | 9.36455    | 0.79713 |
| Peak76(Shetl) | 179.15111 | 0.44221 | 7054.35965  | 194.23882  | 923 | 0.2683    | 10.03653  | 0.24029  | 116 | 0.25034 | 10.99497   | 0.25753 | 23.63421  | 0.56585  | 25.89117   | 0.60643 |
| Peak77(Shetl) | 179.15111 | 0.44221 | 7773.53924  | 147.79711  | 798 | 0.40467   | 7.88309   | 0.37634  | 158 | 0.22023 | 3.13215    | 0.18712 | 18.56325  | 0.88622  | 7.37564    | 0.44062 |
| Peak78(Shetl) | 179.15111 | 0.44221 | 7710.63504  | 164.64719  | 437 | 0.0886    | 1.49969   | 0.07985  | 277 | 0.30847 | 6.56564    | 0.29081 | 3.53149   | 0.18802  | 15.46091   | 0.68481 |
| Peak79(Shetl) | 179.15111 | 0.44221 | 10234.99372 | 114.34859  | 865 | 0.11237   | 2.02561   | 0.09967  | 685 | 0.17483 | 3.12537    | 0.15675 | 4.76994   | 0.23471  | 7.35968    | 0.36913 |
| Peak80(Shetl) | 179.15111 | 0.44221 | 7581.14968  | 246.69326  | 798 | 0.40148   | 9.25507   | 0.30868  | 150 | 0.26525 | 3.9353     | 0.1916  | 21.79403  | 0.72688  | 9.26691    | 0.45119 |
| Peak81(Shetl) | 179.15111 | 0.44221 | 8886.05023  | --         | 218 | 199.58254 | 0.22461   | 40.01101 | 277 | --      | 3.60608E-7 | --      | 0.52892   | 94.21874 | 8.49167E-7 | --      |
| Peak82(Shetl) | 179.15111 | 0.44221 | 12319.72166 | 775.18698  | 163 | 0.10777   | 1.22057   | 0.10101  | 206 | 0.12603 | 1.46525    | 0.12137 | 2.87421   | 0.23785  | 3.4504     | 0.28581 |
| Peak83(Shetl) | 179.15111 | 0.44221 | 5706.13098  | 307.60211  | 798 | 0.76286   | 17.35395  | 0.63381  | 467 | 0.0893  | 2.18342    | 0.09486 | 40.86543  | 1.4925   | 5.14156    | 0.22338 |
| Peak84(Shetl) | 179.15111 | 0.44221 | 12559.46516 | 314.31179  | 900 | 0.37801   | 10.08244  | 0.30002  | 57  | 0.03932 | 1.19686    | 0.03708 | 23.74234  | 0.7065   | 2.81838    | 0.08732 |
| Peak85(Shetl) | 179.15111 | 0.44221 | 226.53252   | 44.85043   | 879 | 22.38639  | 114.78035 | 22.15222 | 574 | 1.35893 | 14.13625   | 1.23657 | 270.28708 | 52.1645  | 33.28833   | 2.91189 |
| Peak86(Shetl) | 179.15111 | 0.44221 | 11132.08521 | 218.2209   | 694 | 0.1217    | 8.57034   | 0.13498  | 767 | 0.13633 | 9.51583    | 0.15073 | 20.18161  | 0.31785  | 22.40806   | 0.35495 |

|                 |           |         |             |            |     |             |            |             |              |          |         |             |            |          |          |
|-----------------|-----------|---------|-------------|------------|-----|-------------|------------|-------------|--------------|----------|---------|-------------|------------|----------|----------|
| Peak87(Sheet1)  | 179.15111 | 0.44221 | 9321.03883  | 366.45312  | 233 | 0.13101     | 1.40563    | 0.11437     | 2420.182692  | 0.03704  | 0.16048 | 3.31        | 0.269314   | 4.79687  | 0.37791  |
| Peak88(Sheet1)  | 179.15111 | 0.44221 | 10148.25572 | 186.34695  | 853 | 0.12314     | 1.16345    | 0.10166     | 520.170321   | 1.65935  | 0.14082 | 2.73971     | 0.239393   | 3.90747  | 0.33161  |
| Peak89(Sheet1)  | 179.15111 | 0.44221 | 10164.99019 | 1484.14688 | 224 | 5.86212     | 0.29097    | 1.221       | 28346.11490  | 0.24199  | 6.28586 | 0.68519     | 2.875220   | 0.56984  | 14.80206 |
| Peak90(Sheet1)  | 179.15111 | 0.44221 | 5998.28076  | 298.92439  | 174 | 0.08379     | 2.74661    | 0.09374     | 1950.8017728 | 1.4072   | 1.01663 | 6.46777     | 0.22075    | 66.26632 | 2.39399  |
| Peak91(Sheet1)  | 179.15111 | 0.44221 | 11725.07907 | 1553.54306 | 258 | 0.92894     | 0.35526    | 0.27158     | 3170.401470  | 0.42381  | 0.13608 | 0.83657     | 0.63952    | 0.998    | 0.32045  |
| Peak92(Sheet1)  | 179.15111 | 0.44221 | 2596.26479  | 164.15115  | 916 | 0.25872     | 10.39118   | 0.5084      | 130.61086    | 16.96025 | 1.15035 | 24.46936    | 1.19723    | 39.93834 | 2.70886  |
| Peak93(Sheet1)  | 179.15111 | 0.44221 | -424.6206   | 139.51617  | 212 | 23134.36659 | 0.1923     | 2428.60926  | 27410.76797  | 0.06119  | 6.26274 | 0.45284     | 5718.93776 | 16.62784 | 14.74763 |
| Peak94(Sheet1)  | 179.15111 | 0.44221 | 6953.79088  | 233.63067  | 766 | 0.26201     | 7.19239    | 0.23338     | 4170.482678  | 1.3984   | 0.37208 | 16.93679    | 0.54957    | 19.16785 | 0.87618  |
| Peak95(Sheet1)  | 179.15111 | 0.44221 | 3928.29864  | 76.44999   | 212 | 0.558       | 37.47992   | 0.46964     | 2800.32574   | 18.33531 | 0.32581 | 88.25846    | 1.10592    | 43.17636 | 0.76722  |
| Peak96(Sheet1)  | 179.15111 | 0.44221 | 755.99842   | 166.89966  | 394 | 4.02201     | 6.241      | 3.10577     | 2282.83152   | 6.13549  | 1.79642 | 14.69644    | 7.31352    | 14.44797 | 4.23025  |
| Peak97(Sheet1)  | 179.15111 | 0.44221 | 5904.44746  | 183.30613  | 742 | 0.37552     | 9.59076    | 0.36098     | 5830.27675   | 9.27603  | 0.26154 | 22.58451    | 0.85004    | 21.84337 | 0.61588  |
| Peak98(Sheet1)  | 179.15111 | 0.44221 | -1035.54146 | 206.75573  | 171 | 0.72233     | 12.72527   | 1.50023     | 2282.82407   | 26.94035 | 3.50068 | 29.96573    | 3.53277    | 63.43969 | 8.24347  |
| Peak99(Sheet1)  | 179.15111 | 0.44221 | 2771.07662  | 284.14487  | 382 | 0.81085     | 13.62405   | 0.74958     | 2270.39598   | 7.02218  | 0.38362 | 32.08218    | 1.76512    | 16.53597 | 0.90335  |
| Peak100(Sheet1) | 179.15111 | 0.44221 | 5834.5481   | 245.03653  | 118 | 0.47591     | 8.48572    | 0.37713     | 1480.20556   | 4.95871  | 0.19785 | 19.98235    | 0.88806    | 11.67686 | 0.46591  |
| Peak101(Sheet1) | 179.15111 | 0.44221 | 7242.86728  | 363.58732  | 900 | 0.26468     | 9.266      | 0.37356     | 460.11241    | 2.89366  | 0.12015 | 21.81976    | 0.87967    | 6.81406  | 0.28294  |
| Peak102(Sheet1) | 179.15111 | 0.44221 | 2655.60845  | 140.02565  | 922 | 0.54738     | 43.03555   | 1.30746     | 160.26914    | 8.90151  | 0.23018 | 101.34098   | 3.07884    | 20.96146 | 0.54202  |
| Peak103(Sheet1) | 179.15111 | 0.44221 | 5300.89485  | 265.10641  | 694 | 0.3427      | 7.83873    | 0.39983     | 3270.19404   | 3.86537  | 0.19232 | 18.45881    | 0.94152    | 9.10224  | 0.45289  |
| Peak104(Sheet1) | 179.15111 | 0.44221 | 4690.51044  | 179.94923  | 730 | 0.2059      | 2.68454    | 0.24352     | 5830.46013   | 7.15964  | 0.32848 | 6.3216      | 0.57346    | 16.85966 | 0.77351  |
| Peak105(Sheet1) | 179.15111 | 0.44221 | 8940.29842  | 232.97026  | 358 | 0.13517     | 4.27245    | 0.13088     | 3500.19284   | 5.99984  | 0.19683 | 10.06084    | 0.3082     | 14.12855 | 0.46351  |
| Peak106(Sheet1) | 179.15111 | 0.44221 | 7440.64574  | --         | 737 | 0.56036     | 4.19108    | 0.1951      | 4940.08719   | 0.83934  | 0.06868 | 9.86925     | 0.45942    | 1.97649  | 0.16172  |
| Peak107(Sheet1) | 179.15111 | 0.44221 | 7650.85102  | 358.84106  | 736 | 0.31023     | 3.57907    | 0.31474     | 5910.10695   | 1.15765  | 0.1057  | 8.42807     | 0.74116    | 2.72606  | 0.2489   |
| Peak108(Sheet1) | 179.15111 | 0.44221 | 4459.37943  | 1350.25032 | 746 | 2.55664     | 7.0948     | 0.94501     | 1230.48598   | 4.24399  | 0.31819 | 16.70698    | 2.22533    | 9.99383  | 0.74927  |
| Peak109(Sheet1) | 179.15111 | 0.44221 | 5501.82144  | 155.81824  | 127 | 0.34394     | 2.67307    | 0.32888     | 1500.28551   | 2.35203  | 0.27585 | 6.29459     | 0.77444    | 5.5386   | 0.64957  |
| Peak110(Sheet1) | 179.15111 | 0.44221 | 8583.82788  | 179.58848  | 213 | 0.11244     | 1.9684     | 0.09926     | 2300.25571   | 4.40891  | 0.22637 | 4.63522     | 0.23373    | 10.38219 | 0.53306  |
| Peak111(Sheet1) | 179.15111 | 0.44221 | 3825.95123  | 306.65621  | 944 | 0.66213     | 10.57315   | 0.67464     | 1450.23327   | 3.57955  | 0.24538 | 24.89788    | 1.58867    | 8.4292   | 0.57783  |
| Peak112(Sheet1) | 179.15111 | 0.44221 | 8666.3134   | 221.72877  | 726 | 0.08855     | 3.47905    | 0.08446     | 400.31344    | 15.6471  | 0.38493 | 8.19254     | 0.1989     | 36.8461  | 0.90644  |
| Peak113(Sheet1) | 179.15111 | 0.44221 | 7684.86636  | 225.68005  | 683 | 0.1029      | 2.10464    | 0.09937     | 3370.38047   | 0.07572  | 0.36889 | 4.95604     | 0.23401    | 16.66204 | 0.86866  |
| Peak114(Sheet1) | 179.15111 | 0.44221 | 10718.33494 | 240.32972  | 899 | 0.29462     | 9.10635    | 0.32317     | 6580.06755   | 2.26263  | 0.06678 | 21.44381    | 0.76101    | 5.32808  | 0.15725  |
| Peak115(Sheet1) | 179.15111 | 0.44221 | 8256.09965  | 268.91604  | 273 | 0.10258     | 3.42657    | 0.1077      | 3180.28774   | 10.24762 | 0.32895 | 8.06895     | 0.25362    | 24.13129 | 0.77462  |
| Peak116(Sheet1) | 179.15111 | 0.44221 | 11455.78924 | 365.57161  | 49  | 0.06829     | 2.3317     | 0.06989     | 3590.26839   | 7.80702  | 0.23409 | 5.49072     | 0.16459    | 18.38412 | 0.55125  |
| Peak117(Sheet1) | 179.15111 | 0.44221 | 5049.54864  | 186.25457  | 408 | 0.33145     | 9.01427    | 0.33717     | 3380.30593   | 6.64341  | 0.24393 | 21.22697    | 0.79397    | 15.64404 | 0.57441  |
| Peak118(Sheet1) | 179.15111 | 0.44221 | 7836.33625  | 217.91436  | 141 | 0.12722     | 4.18131    | 0.12605     | 720.29981    | 8.96862  | 0.31086 | 9.84623     | 0.29683    | 21.1195  | 0.73201  |
| Peak119(Sheet1) | 179.15111 | 0.44221 | 7663.2121   | 44.36215   | 526 | 1969.57013  | 15168.1231 | 44158.52847 | 2360.00718   | 0.64756  | 0.00499 | 35718.19846 | 103985.388 | 1.52488  | 0.01176  |
| Peak120(Sheet1) | 179.15111 | 0.44221 | 3498.36912  | 229.12339  | 592 | 0.25259     | 8.54019    | 0.53034     | 2770.36846   | 8.1256   | 0.49678 | 20.11061    | 1.24886    | 19.13432 | 1.16983  |
| Peak121(Sheet1) | 179.15111 | 0.44221 | 10460.23833 | 416.82993  | 491 | 0.32145     | 7.86384    | 0.259       | 1010.07841   | 2.58563  | 0.08519 | 18.51793    | 0.60989    | 6.0887   | 0.20062  |
| Peak122(Sheet1) | 179.15111 | 0.44221 | 9054.7375   | 398.05109  | 306 | 0.38491     | 8.25517    | 0.33888     | 6920.08253   | 2.2437   | 0.08701 | 19.43944    | 0.7985     | 2.8351   | 0.2049   |
| Peak123(Sheet1) | 179.15111 | 0.44221 | 6637.28506  | 281.09423  | 199 | 0.33505     | 8.85328    | 0.3449      | 2480.16214   | 4.42634  | 0.1767  | 20.84787    | 0.81217    | 10.42324 | 0.41609  |
| Peak124(Sheet1) | 179.15111 | 0.44221 | 6244.32367  | 193.28935  | 396 | 0.5505      | 22.48698   | 0.54659     | 3380.07751   | 2.16055  | 0.08481 | 52.9528     | 1.28713    | 5.0877   | 0.19972  |
| Peak125(Sheet1) | 179.15111 | 0.44221 | 6845.39358  | 327.89286  | 540 | 0.21196     | 4.82424    | 0.20631     | 3280.21459   | 5.37739  | 0.22938 | 11.36021    | 0.48582    | 12.66279 | 0.54014  |
| Peak126(Sheet1) | 179.15111 | 0.44221 | 8070.59324  | 324.89684  | 440 | 0.11228     | 3.69409    | 0.12323     | 930.33919    | 3.0402   | 0.32711 | 8.69891     | 0.29018    | 21.90929 | 0.77027  |
| Peak127(Sheet1) | 179.15111 | 0.44221 | 7970.31397  | 192.41373  | 897 | 0.29516     | 10.3103    | 0.30921     | 6740.12325   | 4.67755  | 0.12376 | 24.2789     | 0.72813    | 11.01478 | 0.29144  |
| Peak128(Sheet1) | 179.15111 | 0.44221 | 7727.03289  | 388.57748  | 745 | 0.18369     | 4.69006    | 0.19806     | 3480.19016   | 4.91572  | 0.20836 | 11.04424    | 0.46639    | 11.57563 | 0.49064  |
| Peak129(Sheet1) | 179.15111 | 0.44221 | 5601.35206  | 237.95676  | 183 | 1.00304     | 15.5971    | 0.64413     | 6040.06083   | 0.87137  | 0.05193 | 36.72835    | 1.51682    | 2.05192  | 0.12228  |
| Peak130(Sheet1) | 179.15111 | 0.44221 | 4052.95147  | 296.56747  | 907 | 0.20011     | 1.6015     | 0.20944     | 1130.55965   | 1.4427   | 0.54477 | 3.77125     | 0.49318    | 12.11384 | 1.28285  |
| Peak131(Sheet1) | 179.15111 | 0.44221 | 7115.70249  | 243.35158  | 311 | 0.24126     | 8.53722    | 0.25353     | 3250.19468   | 6.6971   | 0.19856 | 20.10361    | 0.59701    | 15.77046 | 0.46757  |
| Peak132(Sheet1) | 179.15111 | 0.44221 | 7573.64484  | 219.81209  | 263 | 0.19292     | 8.11869    | 0.20389     | 8920.19454   | 7.98268  | 0.2003  | 19.11806    | 0.48011    | 18.7977  | 0.47166  |
| Peak133(Sheet1) | 179.15111 | 0.44221 | 8600.87198  | 209.87415  | 18  | 0.35052     | 7.39324    | 0.27112     | 1990.08195   | 1.78255  | 0.0727  | 17.40975    | 0.63843    | 4.19758  | 0.1712   |
| Peak134(Sheet1) | 179.15111 | 0.44221 | 8373.36581  | 319.11487  | 481 | 0.17058     | 4.15597    | 0.16626     | 1210.17817   | 4.35375  | 0.17445 | 9.78656     | 0.39151    | 10.2523  | 0.41081  |

|                 |           |         |            |            |     |            |          |         |     |          |            |           |          |         |            |              |
|-----------------|-----------|---------|------------|------------|-----|------------|----------|---------|-----|----------|------------|-----------|----------|---------|------------|--------------|
| Peak135(Sheet1) | 179.15111 | 0.44221 | 8416.84827 | 294.00357  | 771 | 0.10319    | 2.39421  | 0.09975 | 297 | 0.38897  | 6.69979    | 0.32097   | 5.63794  | 0.23491 | 15.77679   | 0.75583      |
| Peak136(Sheet1) | 179.15111 | 0.44221 | 5126.5046  | 186.21321  | 872 | 0.32196    | 6.22379  | 0.29282 | 536 | 0.56118  | 6.46978    | 0.48048   | 14.65591 | 0.68954 | 15.23517   | 1.13143      |
| Peak137(Sheet1) | 179.15111 | 0.44221 | 7176.95351 | 399.70915  | 599 | 0.11841    | 2.81794  | 0.1275  | 400 | 0.31243  | 8.29207    | 0.36338   | 6.63575  | 0.30023 | 19.52634   | 0.8557       |
| Peak138(Sheet1) | 179.15111 | 0.44221 | 9305.90141 | 790.74018  | 839 | 0.18553    | 2.02971  | 0.17854 | 93  | 0.13253  | 1.47986    | 0.13067   | 4.77961  | 0.42043 | 3.4848     | 0.3077       |
| Peak139(Sheet1) | 179.15111 | 0.44221 | 7649.35489 | 341.1407   | 449 | 0.26523    | 7.57143  | 0.30115 | 183 | 0.13445  | 3.88349    | 0.14679   | 17.82935 | 0.70916 | 9.14492    | 0.34566      |
| Peak140(Sheet1) | 179.15111 | 0.44221 | 4264.9002  | 216.37661  | 194 | 0.35686    | 6.81022  | 0.30847 | 203 | 0.27027  | 9.55195    | 0.39612   | 16.03683 | 0.72639 | 22.49312   | 0.93279      |
| Peak141(Sheet1) | 179.15111 | 0.44221 | 6500.67521 | 392.34782  | 395 | 0.1667     | 3.81507  | 0.18171 | 93  | 0.40168  | 7.21274    | 0.35322   | 8.98381  | 0.42789 | 16.9847    | 0.83176      |
| Peak142(Sheet1) | 179.15111 | 0.44221 | 7697.80808 | 312.77473  | 627 | 0.36652    | 8.05486  | 0.28864 | 412 | 0.13308  | 3.91503    | 0.13646   | 18.96775 | 0.67969 | 9.2192     | 0.32134      |
| Peak143(Sheet1) | 179.15111 | 0.44221 | 3592.41456 | 487.05924  | 896 | 0.10474    | 0.66939  | 0.07517 | 14  | 1.50555  | 13.20934   | 2.04956   | 1.57629  | 0.17701 | 31.10562   | 4.82635      |
| Peak144(Sheet1) | 179.15111 | 0.44221 | 8971.04964 | 214.28947  | 11  | 0.1489     | 3.16731  | 0.13589 | 101 | 0.17281  | 3.58509    | 0.1528    | 7.45845  | 0.328   | 8.44223    | 0.35981      |
| Peak145(Sheet1) | 179.15111 | 0.44221 | 8655.32085 | 250.84256  | 561 | 0.17608    | 3.57489  | 0.15808 | 369 | 0.17176  | 3.60576    | 0.1597    | 8.41823  | 0.37226 | 8.49092    | 0.37607      |
| Peak146(Sheet1) | 179.15111 | 0.44221 | 6331.44047 | 366.86941  | 95  | 0.27905    | 6.58908  | 0.32954 | 287 | 0.17766  | 3.94204    | 0.19008   | 15.51609 | 0.77601 | 9.28279    | 0.44762      |
| Peak147(Sheet1) | 179.15111 | 0.44221 | 6627.45657 | 358.13009  | 88  | 0.23162    | 4.14525  | 0.22169 | 21  | 0.24094  | 1.8851     | 0.2243    | 9.76132  | 0.52203 | 9.86319    | 0.5282       |
| Peak148(Sheet1) | 179.15111 | 0.44221 | 5261.49131 | 181.93411  | 941 | 0.29083    | 8.49125  | 0.3117  | 46  | 0.26294  | 7.00798    | 0.25674   | 19.99536 | 0.734   | 16.50252   | 0.60458      |
| Peak149(Sheet1) | 179.15111 | 0.44221 | 5706.87099 | 173.7863   | 771 | 0.21751    | 4.46453  | 0.21033 | 585 | 0.31108  | 7.73968    | 0.33636   | 10.51315 | 0.4953  | 18.22556   | 0.79206      |
| Peak150(Sheet1) | 179.15111 | 0.44221 | 4489.81035 | 241.91623  | 685 | 0.23483    | 3.69964  | 0.21098 | 808 | 0.60898  | 7.83494    | 0.41609   | 8.71199  | 0.49682 | 18.4498    | 0.97981      |
| Peak151(Sheet1) | 179.15111 | 0.44221 | 7012.83757 | 344.64806  | 162 | 0.49044    | 4.67865  | 0.42254 | 854 | 0.11428  | 1.45209    | 0.10949   | 11.01739 | 0.99501 | 3.41942    | 0.25783      |
| Peak152(Sheet1) | 179.15111 | 0.44221 | 5978.06029 | 484.36504  | 129 | 0.30012    | 3.782    | 0.29435 | 368 | 0.31566  | 3.85639    | 0.30304   | 8.90593  | 0.69314 | 9.08109    | 0.7136       |
| Peak153(Sheet1) | 179.15111 | 0.44221 | 4833.97138 | 407.95171  | 480 | 0.39303    | 4.64046  | 0.38604 | 148 | 0.35907  | 4.5306     | 0.37177   | 10.92745 | 0.90906 | 10.66874   | 0.87546      |
| Peak154(Sheet1) | 179.15111 | 0.44221 | 4270.59262 | 308.03966  | 121 | 0.63063    | 8.27609  | 0.39647 | 89  | 0.18916  | 2.55638    | 0.17814   | 19.4887  | 0.93361 | 6.01981    | 0.41948      |
| Peak155(Sheet1) | 179.15111 | 0.44221 | 4876.14216 | 417.19967  | 722 | 0.38116    | 3.91035  | 0.30697 | 677 | 0.40362  | 4.40395    | 0.35496   | 9.20817  | 0.72285 | 10.37051   | 0.83586      |
| Peak156(Sheet1) | 179.15111 | 0.44221 | 5576.2623  | 237.27586  | 701 | 0.29189    | 4.01706  | 0.23725 | 307 | 0.31236  | 4.64211    | 0.28784   | 9.45944  | 0.55867 | 10.93133   | 0.6778       |
| Peak157(Sheet1) | 179.15111 | 0.44221 | 6607.46804 | 406.36879  | 394 | 0.08235    | 1.25538  | 0.07782 | 31  | 0.53183  | 8.81055    | 0.35899   | 2.9562   | 0.18325 | 20.74726   | 0.84536      |
| Peak158(Sheet1) | 179.15111 | 0.44221 | 6312.75238 | 531.80477  | 352 | 0.14652    | 2.16166  | 0.15462 | 564 | 0.42955  | 2.5217     | 0.3559    | 5.09033  | 0.36409 | 12.36792   | 0.83808      |
| Peak159(Sheet1) | 179.15111 | 0.44221 | 6301.05043 | 623.08731  | 122 | 0.39755    | 1.41033  | 0.30999 | 686 | 0.18476  | 0.82904    | 0.15885   | 3.32107  | 0.72996 | 1.95223    | 0.37407      |
| Peak160(Sheet1) | 179.15111 | 0.44221 | 3248.82185 | 344.613    | 456 | 0.19718    | 1.59178  | 0.17827 | 379 | 0.69864  | 8.14177    | 0.48704   | 3.74836  | 0.41979 | 19.1724    | 1.14689      |
| Peak161(Sheet1) | 179.15111 | 0.44221 | 7431.0451  | 2029.02427 | 189 | 0.19767    | 0.76174  | 0.18536 | 307 | 0.21105  | 0.71429    | 0.16425   | 1.79375  | 0.43648 | 1.68202    | 0.38677      |
| Peak162(Sheet1) | 179.15111 | 0.44221 | 5640.09223 | 295.62335  | 74  | 0.17157    | 2.7105   | 0.16182 | 831 | 0.44343  | 5.97329    | 0.34599   | 6.38274  | 0.38106 | 14.06603   | 0.81474      |
| Peak163(Sheet1) | 179.15111 | 0.44221 | 3767.0461  | 175.04186  | 962 | 0.4625     | 12.06702 | 0.44621 | 134 | 0.36524  | 7.39267    | 0.40602   | 28.41566 | 1.05073 | 17.4084    | 0.95611      |
| Peak164(Sheet1) | 179.15111 | 0.44221 | 1804.61253 | 254.32681  | 125 | 1.19164    | 8.70339  | 0.68019 | 692 | 0.22784  | 7.01955    | 0.58345   | 20.49493 | 1.60172 | 16.52977   | 1.37391      |
| Peak165(Sheet1) | 179.15111 | 0.44221 | 4535.12981 | 570.87472  | 511 | 0.74657    | 5.26561  | 0.46779 | 57  | 0.17719  | 1.48448    | 0.16672   | 12.39956 | 1.10155 | 3.49569    | 0.39259      |
| Peak166(Sheet1) | 179.15111 | 0.44221 | 2799.11715 | 348.25872  | 941 | 0.16893    | 11.24055 | 0.94718 | 78  | 0.31618  | 2.59552    | 0.26266   | 26.46947 | 2.23044 | 6.11198    | 0.61851      |
| Peak167(Sheet1) | 179.15111 | 0.44221 | 7965.68641 | 106308E10  | 450 | 2.79497E10 | 0.00429  | --      | 372 | 228.1422 | 2.89536E-8 | 273162.11 | 0.01011  | --      | 6.81804E-8 | 643247.63207 |
| Peak168(Sheet1) | 179.15111 | 0.44221 | 2177.80964 | 195.24946  | 203 | 0.49065    | 11.66779 | 0.57799 | 912 | 0.72374  | 9.37128    | 0.51785   | 27.47555 | 1.36105 | 22.06768   | 1.21945      |
| Peak169(Sheet1) | 179.15111 | 0.44221 | 5504.37588 | 331.62217  | 19  | 0.42785    | 8.77806  | 0.4202  | 575 | 0.16813  | 3.53775    | 0.17595   | 20.67076 | 0.98949 | 8.33076    | 0.41434      |
| Peak170(Sheet1) | 179.15111 | 0.44221 | 4392.34422 | 221.90505  | 838 | 0.38057    | 7.86737  | 0.34473 | 544 | 0.39445  | 7.87587    | 0.35007   | 18.52623 | 0.81177 | 18.54626   | 0.82436      |
| Peak171(Sheet1) | 179.15111 | 0.44221 | 8037.14144 | 2013.5665  | 695 | 0.61469    | 0.40545  | 0.22156 | 242 | 0.41782  | 0.47822    | 0.16146   | 0.95477  | 0.52173 | 1.12611    | 0.38022      |
| Peak172(Sheet1) | 179.15111 | 0.44221 | 3901.4378  | 603.45398  | 948 | 0.5736     | 1.35082  | 0.63505 | 64  | 5.40968  | 0.30712    | 0.88803   | 3.18093  | 1.49544 | 0.72321    | 2.09116      |
| Peak173(Sheet1) | 179.15111 | 0.44221 | 3594.80475 | 287.1127   | 765 | 0.35602    | 2.87777  | 0.3827  | 573 | 0.52488  | 3.36978    | 0.46303   | 6.77662  | 0.90118 | 7.93523    | 1.09035      |
| Peak174(Sheet1) | 179.15111 | 0.44221 | 3917.1862  | 1679.4684  | 875 | 0.48208    | 0.80464  | 0.33814 | 638 | 0.35675  | 0.69243    | 0.27779   | 1.89479  | 0.79625 | 1.63054    | 0.65414      |
| Peak175(Sheet1) | 179.15111 | 0.44221 | 2343.04818 | 391.69589  | 110 | 0.81106    | 5.00604  | 0.632   | 41  | 0.81374  | 4.87583    | 0.60985   | 11.78832 | 1.48824 | 11.48171   | 1.43608      |
| Peak176(Sheet1) | 179.15111 | 0.44221 | 1230.35746 | 260.11985  | 724 | 0.65986    | 1.84638  | 0.31924 | 125 | 0.55892  | 3.12248    | 0.39305   | 4.3479   | 0.75175 | 7.35287    | 0.92556      |
| Peak177(Sheet1) | 179.15111 | 0.44221 | 4688.66783 | 1167.0037  | 988 | 0.38866    | 1.39776  | 0.31605 | 635 | 0.42585  | 1.52652    | 0.3504    | 3.29148  | 0.74425 | 3.59467    | 0.82513      |
| Peak178(Sheet1) | 179.15111 | 0.44221 | 2456.72849 | 170.57939  | 512 | 0.37739    | 9.79896  | 0.30408 | 376 | 0.33316  | 4.42811    | 0.3471    | 23.07479 | 0.71604 | 10.42741   | 0.81736      |
| Peak179(Sheet1) | 179.15111 | 0.44221 | 5345.24657 | 435.23295  | 956 | 0.12921    | 1.77774  | 0.12757 | 400 | 0.74814  | 7.94974    | 0.41132   | 4.18627  | 0.3004  | 18.7202    | 0.96859      |
| Peak180(Sheet1) | 179.15111 | 0.44221 | 3167.15657 | 246.45282  | 477 | 0.45633    | 2.09191  | 0.35662 | 184 | 0.42999  | 2.31889    | 0.4045    | 4.92607  | 0.83978 | 5.46058    | 0.95252      |
| Peak181(Sheet1) | 179.15111 | 0.44221 | 4689.11192 | 380.47562  | 329 | 0.19066    | 3.10697  | 0.19987 | 72  | 0.62372  | 8.08559    | 0.42197   | 7.31635  | 0.47067 | 19.0401    | 0.99366      |
| Peak182(Sheet1) | 179.15111 | 0.44221 | 3351.99379 | 198.71114  | 143 | 0.39938    | 7.60869  | 0.35438 | 117 | 0.33859  | 4.39034    | 0.31166   | 17.91711 | 0.8345  | 10.33845   | 0.73391      |

|                     |               |             |                |                  |          |                 |         |            |              |          |                 |         |              |           |
|---------------------|---------------|-------------|----------------|------------------|----------|-----------------|---------|------------|--------------|----------|-----------------|---------|--------------|-----------|
| Peak183(She<br>et1) | 179.151<br>11 | 0.4422<br>1 | 2043.001<br>78 | 83.60911<br>872  | 0.30549  | 5.85395         | 0.28348 | 6610.28378 | 38.4571<br>2 | 0.98212  | 13.78499        | 0.66755 | 90.5595<br>9 | 2.31272   |
| Peak184(She<br>et1) | 179.151<br>11 | 0.4422<br>1 | 2536.585<br>21 | 1.83921E8<br>471 | 0.012788 | 8.87346E-<br>11 | 0.62449 | 255265.829 | 0.23622      | 65.68351 | 2.08954E-<br>10 | 1.47057 | 0.55626      | 154.67285 |
| Peak185(She<br>et1) | 179.151<br>11 | 0.4422<br>1 | 1802.020<br>6  | 115.46255<br>511 | 0.69961  | 8.94505         | 0.30071 | 3840.36402 | 3.52642      | 0.40756  | 21.06398        | 0.70812 | 8.30407      | 0.95973   |
| Peak186(She<br>et1) | 179.151<br>11 | 0.4422<br>1 | 4276.593<br>49 | 53.17595<br>471  | 0.25157  | 40.37579        | 0.42992 | 2580.33497 | 20.7772<br>1 | 0.28624  | 95.07773        | 1.01238 | 48.9265<br>8 | 0.67404   |
| Peak187(She<br>et1) | 179.151<br>11 | 0.4422<br>1 | 5423.862<br>1  | 239.8821<br>93   | 0.14641  | 2.30306         | 0.13928 | 720.56462  | 7.38722      | 0.49614  | 5.4233          | 0.32798 | 17.3955<br>8 | 1.16831   |
| Peak188(She<br>et1) | 179.151<br>11 | 0.4422<br>1 | 5017.183<br>51 | 389.60776<br>887 | 0.17369  | 2.6879          | 0.17669 | 3410.59181 | 7.52212      | 0.42269  | 6.32951         | 0.41607 | 17.7132<br>4 | 0.99536   |
| Peak189(She<br>et1) | 179.151<br>11 | 0.4422<br>1 | 4198.086<br>52 | 358.20105<br>668 | 0.23276  | 3.73164         | 0.24255 | 4990.62367 | 8.56877      | 0.43132  | 8.78733         | 0.57115 | 20.1779<br>2 | 1.01569   |
| Peak190(She<br>et1) | 179.151<br>11 | 0.4422<br>1 | 2839.271<br>69 | 130.5393<br>797  | 0.3009   | 10.12203        | 0.44059 | 4200.43059 | 16.2722<br>1 | 0.47007  | 23.83557        | 1.03752 | 38.3181<br>3 | 1.10694   |
| Peak191(She<br>et1) | 179.151<br>11 | 0.4422<br>1 | 2443.427<br>41 | 412.06366<br>193 | 0.77808  | 4.5406          | 0.56967 | 4120.77482 | 4.13371      | 0.52752  | 10.69229        | 1.34147 | 9.73414      | 1.24222   |
| Peak192(She<br>et1) | 179.151<br>11 | 0.4422<br>1 | 5056.578<br>25 | 318.17257<br>872 | 0.15895  | 2.38271         | 0.15246 | 3390.38392 | 7.41922      | 0.3727   | 5.61086         | 0.35901 | 17.4709<br>2 | 0.87764   |
| Peak193(She<br>et1) | 179.151<br>11 | 0.4422<br>1 | 4156.965<br>79 | 383.17033<br>632 | 0.30269  | 7.917           | 0.4813  | 5080.23444 | 3.30432      | 0.23884  | 18.64311        | 1.13337 | 7.78108      | 0.56244   |
| Peak194(She<br>et1) | 179.151<br>11 | 0.4422<br>1 | 2100.232<br>44 | 247.76842<br>855 | 0.76985  | 6.77258         | 0.51092 | 2970.67023 | 8.84057      | 0.6496   | 15.9482         | 1.20311 | 20.8179<br>6 | 1.52969   |
| Peak195(She<br>et1) | 179.151<br>11 | 0.4422<br>1 | 3139.439<br>95 | 311.01873<br>706 | 0.61788  | 4.80323         | 0.51285 | 230.4861   | 4.569        | 0.4804   | 11.31074        | 1.20766 | 10.7591<br>7 | 1.13126   |
| Peak196(She<br>et1) | 179.151<br>11 | 0.4422<br>1 | 3527.153<br>12 | 202.97621<br>163 | 0.28273  | 8.84976         | 0.38646 | 1330.38416 | 6.0078       | 0.34291  | 20.8396         | 0.91003 | 14.1472<br>8 | 0.80749   |
| Peak197(She<br>et1) | 179.151<br>11 | 0.4422<br>1 | 3347.036<br>95 | 498.50888<br>564 | 0.57079  | 3.87611         | 0.42072 | 7350.54725 | 3.79834      | 0.41619  | 9.12753         | 0.99071 | 8.94442      | 0.98005   |
| Peak198(She<br>et1) | 179.151<br>11 | 0.4422<br>1 | 1645.509<br>77 | 246.46597<br>655 | 1.39441  | 9.24279         | 0.81733 | 940.83957  | 6.88796      | 0.6333   | 21.76511        | 1.92465 | 16.2199<br>2 | 1.49131   |
| Peak199(She<br>et1) | 179.151<br>11 | 0.4422<br>1 | 4746.567<br>68 | 302.36071<br>320 | 0.18074  | 2.28987         | 0.16122 | 3790.62102 | 7.20735      | 0.44689  | 5.39222         | 0.37964 | 16.9720<br>1 | 1.05235   |
| Peak200(She<br>et1) | 179.151<br>11 | 0.4422<br>1 | 3460.430<br>19 | 439.81296<br>264 | 0.715    | 8.0696          | 0.59471 | 9350.32051 | 2.64961      | 0.25752  | 19.00245        | 1.40044 | 6.23934      | 0.60642   |

## 5. Gaussian surface fitting code (Generated by ChatGPT)

\*\*\*\*\*

```
import numpy as np

from scipy.optimize import curve_fit

# Define the Gaussian function
def gaussian_surface(xy, A, x0, y0, sigma_x, sigma_y):

    x, y = xy

    return A * np.exp(-(((x - x0) ** 2) / (2 * sigma_x ** 2)) - (((y - y0) ** 2) / (2 * sigma_y ** 2)))

# Generate example data (replace with your actual data)
x_data = ...
y_data = ...
z_data = ...

# Perform the curve fitting
initial_guess = [1.0, 0.0, 0.0, 1.0, 1.0] # Initial parameter guess
popt, pcov = curve_fit(gaussian_surface, (x_data, y_data), z_data, p0=initial_guess)

# Extract the fitted parameters
```

```
A_fit, x0_fit, y0_fit, sigma_x_fit, sigma_y_fit = popt
```

```
# Evaluate the fitted Gaussian surface
```

```
x_eval = ... # Replace with the x-values at which you want to evaluate the surface
```

```
y_eval = ... # Replace with the y-values at which you want to evaluate the surface
```

```
z_fit = gaussian_surface((x_eval, y_eval), A_fit, x0_fit, y0_fit, sigma_x_fit, sigma_y_fit)
```

```
# Print the fitted parameters
```

```
print("Fitted Amplitude (A):", A_fit)
```

```
print("Fitted x0:", x0_fit)
```

```
print("Fitted y0:", y0_fit)
```

```
print("Fitted Sigma_x:", sigma_x_fit)
```

```
print("Fitted Sigma_y:", sigma_y_fit)
```

```
*****
```

Make sure to replace `x_data`, `y_data`, and `z_data` with your actual data arrays. Also, provide appropriate values or arrays for `x_eval` and `y_eval` to evaluate the fitted surface at desired points.

This code assumes that you have NumPy and SciPy libraries installed. If you don't have them, you can install them using `pip install numpy scipy`.

Please note that this is a basic example, and you may need to adjust it according to your specific requirements and data structure.

## 6. Real sample #3: mixture

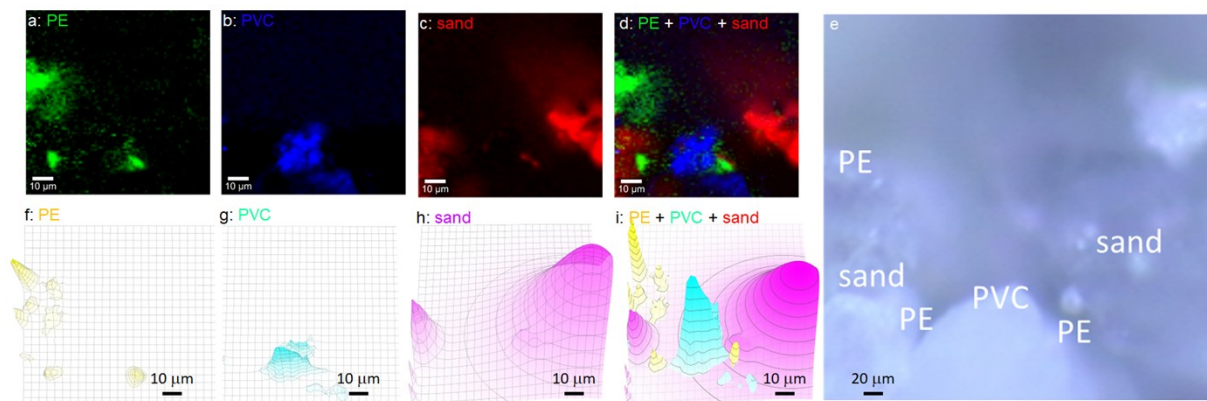

Figure S4. Raman images (a-d), re-constructed images (f-i) and photo image (e). The sample was a mixture of sand, PE and PVC. Raman images (a-d) are mapped via their characteristic peaks at  $\sim 1059$

cm<sup>-1</sup> for PE, ~695 cm<sup>-1</sup> for PVC, and ~520 cm<sup>-1</sup> for sand, and re-construct as (f-i), respectively. (d, i) merges them to show the mixture of plastics and sand. (e) shows a photo image for comparison with the items identified by Raman.

A mixture is analysed in this section, including PE, PVC and sand <sup>1</sup>. The mapping and imaging are based on their characteristic peaks towards identification. The images (a-c) can be re-constructed as (f-h), individually. The mixture can be visualised in (d) and (i), before and after the re-construction. The imaging and assignment certainty can be significantly increased by the image re-construction. Compared to the photo image in (e), the advantage of Raman imaging is obviously demonstrated, along with the image re-construction. That is, the reported approach can effectively identify and visualise the mixture containing the different plastics and other items, which cannot be achieved in the photo image.

## Reference

1. Z. Sobhani, M. Al Amin, R. Naidu, M. Megharaj and C. Fang, *Analytica Chimica Acta*, 2019, **1077**, 191-199.
